# Supplementary material
Source: PubMed Central journal article supplement (PMC6439620)
Supplement: jama-321-654-s001.pdf [file jama-321-654-s001.pdf]

1 **SUPPLEMENT**  
2 **TRIAL PROTOCOL AND STATISTICAL ANALYSIS PLAN**  
3 **ANDROMEDA-SHOCK STUDY**

4  
5 This supplement contains the following items

- 6  
7 S1. Original protocol and statement about changes  
8 S2. Original statistical analysis plan and statement about changes  
9

10 **S1. THE ANDROMEDA-SHOCK STUDY PROTOCOL**

11 Glenn Hernandez (co-chair), Gustavo Ospina-Tascón, Lucas Petri Damiani, Elisa Estenssoro,  
12 Arnaldo Dubin, Javier Hurtado, Gilberto Friedman, Ricardo Castro, Leyla Alegría, Jean-Louis  
13 Teboul, Maurizio Cecconi, Giorgio Ferri, Manuel Jibaja, Ronald Pairumani, Paula Fernández, Diego  
14 Barahona, Alexandre Biasi Cavalcanti and Jan Bakker (co-chair), for the ANDROMEDA-SHOCK  
15 Investigators and the Latin America Intensive Care Network (LIVEN)

16

17 The ANDROMEDA-SHOCK STUDY PROTOCOL was accepted for publication by Annals of  
18 Intensive Care on April 12, 2018 and is accessible on  
19 (<https://www.ncbi.nlm.nih.gov/pubmed/29687277>).

20 The trial protocol (version 1.0 from December, 2016) was submitted and published, is registered  
21 with ClinicalTrials.gov (NCT03078712), and was approved by the Institutional Review Boards (IRB)  
22 of all the participant centers.

23 No amendment was performed to the Study Protocol since the IRB approval of the first version of  
24 the study.

25

26

27

28

29

30

31

32

33

34

35

36

37

38

39

40

41

42

43 **Abbreviations**

44 APACHE: Acute Physiology and Chronic Health Evaluation

45 AKI: acute kidney injury

46 CRT: capillary refill time

47 CVP: central venous pressure

48 DSMC: Data Safety Monitoring Committee

49 ED: emergency department

50 HR: heart rate

51 IRB: Institutional Review Board

52 ICU: intensive care unit

53 LTR: lactate-targeted resuscitation

54 MAP: mean arterial pressure

55 MV: mechanical ventilation

56 NE: norepinephrine

57 PLR: passive leg raising

58 P(cv-a) CO<sub>2</sub>: central venous-arterial pCO<sub>2</sub> gradient

59 PPTR: peripheral perfusion-targeted resuscitation

60 PPV: pulse pressure variation

61 RRT: renal replacement therapy

62 ScvO<sub>2</sub>: central venous oxygen saturation

63 SOFA: Sequential Organ Failure Assessment

64 SVV: stroke volume variation

65 SCC: Study Coordinating Center

66 SSC: Surviving Sepsis campaign

67

68

69

70

71 **A. Background**

72 Septic shock is a highly lethal condition associated with a mortality risk of 30 to 60% [1,2]. It is  
73 currently the most frequent cause of death in the intensive care unit (ICU) as we demonstrated in a  
74 recent Chilean prevalence study [3]. Several pathogenic factors such as hypovolemia, myocardial  
75 depression, vasoplegia, and microcirculatory abnormalities can induce progressive tissue  
76 hypoperfusion in severe cases [4]. In this context, persistent hyperlactatemia has been traditionally  
77 considered as the hallmark of ongoing tissue hypoxia during septic shock [4], and therefore lactate  
78 normalization is recommended as a resuscitation target by recent guidelines [5].

79 ***Pathophysiologic determinants of persistent hyperlactatemia***

80 The physiologic basis of lactate generation or clearance during septic shock has been matter of  
81 active research [4]. Hypovolemia-induced hypoperfusion is probably the predominant pathogenic  
82 mechanism during the early phase [4]. Some patients resolve acute circulatory dysfunction and  
83 clear lactate after initial fluid resuscitation, while others evolve into a persistent circulatory  
84 dysfunction with hyperlactatemia [4]. Several mechanisms have been associated to persistent  
85 hyperlactatemia besides hypoperfusion, and recent literature has highlighted the role of sustained  
86 hyperadrenergia with increased muscle aerobic glycolysis (known as stress hyperlactatemia) [6],  
87 and of impaired hepatic lactate clearance [7].

88 We have explored the significance and potential determinants of hyperlactatemia in a series of  
89 clinical physiological studies performed over the last 15 years [7-18]. These studies have addressed  
90 the three most relevant pathogenic factors involved in persistent hyperlactatemia: overt or occult  
91 hypoperfusion, hyperadrenergic state and impaired hepatic clearance. The complexity of this  
92 subject is also highlighted by a more recent study where we demonstrated that lactate decrease  
93 during successful septic shock resuscitation exhibits a biphasic pattern, an early rapid decrease in  
94 parallel to normalization of more flow-sensitive variables (see below), followed by a slower recovery  
95 thereafter [18]. The latter eventually related to non-flow dependent mechanisms such as  
96 hyperadrenergic state and/or delayed hepatic clearance [4, 7,17,18].

97 Persistent hyperlactatemia after initial resuscitation is particularly difficult to interpret as suggested  
98 by the extensive research summarized above [4]. Optimizing systemic blood flow might reverse  
99 ongoing hypoperfusion, a potential source of anaerobic lactate generation. Under this perspective,  
100 some of the pathogenic factors involved in hyperlactatemia are potentially flow-sensitive, and others  
101 are not. Distinction between the two scenarios could strongly impact further resuscitation. If  
102 persistent hyperlactatemia is caused by non-hypoperfusion-related mechanisms, then sustained  
103 efforts aimed at increasing cardiac output could lead to detrimental effects of excessive fluids or  
104 inotropes, a fact now well demonstrated in the literature [4]. The decision of when to consider that a  
105 patient has been fully resuscitated and as a consequence stop further interventions is a milestone,  
106 and appears as highly relevant since the results of a number of recent studies have increased  
107 awareness about the risk of fluid overload and/or of vasopressors and inodilators such as  
108 pulmonary edema, increased intraabdominal hypertension, acute kidney injury, delayed weaning,  
109 arrhythmias, hepatosplanchnic or myocardial ischemia, among other problems [19,20]. By these  
110 means, over-resuscitation could eventually increase morbidity and/or mortality [4,19,20].

111 ***Is hyperlactatemia a valid resuscitation target in septic shock?***

112 Not surprisingly, lactate clearance or normalization is used worldwide as resuscitation targets.  
113 Indeed, the Surviving Sepsis Campaign (SSC), the most ambitious and global collaboration in  
114 critical care, has proposed to focus septic shock resuscitation on normalizing macrohemodynamic  
115 parameters and lactate [5]. SSC guidelines are followed in many countries and adherence to  
116 recommended management bundles have been reported to be associated to improved survival,  
117 although the role of each individual component is not clear [5]. Lactate clearance, defined by a  
118 change of lactate levels between two time-points, and expressed as a 10-20% hourly lactate

119 reduction [21], or a decrease of at least 10% in 6h during early resuscitation [21] has been related  
120 to survival, and tested as a goal in two important studies with conflicting results [22,23].

121 However, there are several unresolved aspects and concerns about the role of lactate as an  
122 appropriate resuscitation target. First, it is not clear if selecting lactate clearance versus lactate  
123 normalization as resuscitation goals is equivalent, but more importantly, if this decision leads to  
124 similar timely resolution of tissue hypoperfusion or hypoxia. Second, since non-hypoperfusion  
125 related causes of hyperlactatemia might predominate in an unknown number of patients, this could  
126 lead to over-resuscitation in at least some of them as stated above. Third, the dynamics of recovery  
127 of lactate might exhibit a biphasic pattern and therefore, the real-time response of lactate to fluid  
128 challenges could be not straightforward depending on the hypoperfusion context [18,24]. Some  
129 survivors might even normalize lactate only after 24h of evolution [18]. Therefore, to explore other  
130 potential resuscitation targets appears as mandatory.

### 131 ***Potential alternative resuscitation targets in septic shock***

132 A foremost priority is to rule out ongoing hypoperfusion in septic shock patients under active  
133 resuscitation. We recently proposed that a simultaneous analysis of central venous O<sub>2</sub> saturation  
134 (ScvO<sub>2</sub>), central venous-arterial pCO<sub>2</sub> gradient (P(cv-a)CO<sub>2</sub>), and peripheral perfusion as assessed  
135 by capillary refill time (CRT), mottling score or central-to-toe temperature differences, might be  
136 helpful in suggesting a hypoperfusion context for patients with or without hyperlactatemia [4]. From  
137 a theoretical point of view, these three easily assessable perfusion-related variables offer an  
138 important advantage over lactate as potential resuscitation targets in septic shock patients: they are  
139 clearly flow-sensitive and exhibit much faster dynamics of recovery after systemic blood flow  
140 optimization. In other words, these parameters might clear in minutes in fluid-responsive patients as  
141 compared to lactate, which sometimes takes hours to recover. We demonstrated this by analyzing  
142 the dynamics of recovery of these parameters in a cohort of ultimately surviving septic shock  
143 patients. ScvO<sub>2</sub>, P(cv-a)CO<sub>2</sub> and CRT were already normal in almost 70% of the patients after 2h  
144 of fluid resuscitation, as compared with only 15% in the case of lactate [18].

145 However, there are also certain drawbacks for some of these perfusion-related flow-sensitive  
146 parameters. ScvO<sub>2</sub> is a complex physiological variable. It was widely used until recently as the  
147 resuscitation goal in critically ill patients [5], although several limitations may preclude a  
148 straightforward interpretation of its changes [4]. For instance, normal or even supranormal ScvO<sub>2</sub>  
149 values do not rule-out global or regional tissue hypoxia for several reasons that have been  
150 highlighted elsewhere, but that include severe microcirculatory derangements impairing tissue O<sub>2</sub>  
151 extraction capabilities [4]. Vallee et al found persistent abnormal P(cv-a)CO<sub>2</sub> values in 50% of septic  
152 shock patients who had already achieved normal ScvO<sub>2</sub> values after initial resuscitation [25].  
153 Nevertheless, in some hyperdynamic states a high efferent venous blood flow could be sufficient to  
154 wash out the global CO<sub>2</sub> generation from hypoperfused tissues; thus, Pcv-aCO<sub>2</sub> could be normal  
155 despite the presence of tissue hypoxia [16]. Another problem for these two variables is that they  
156 necessarily require a central venous catheterization to be assessed, a task that might be complex  
157 to perform in resource-limited settings or emergency departments. Therefore, peripheral perfusion  
158 appears as the most appropriate, alternative resuscitation target in septic shock patients.

### 159 ***Peripheral perfusion as a potential resuscitation target in septic shock patients***

160 The skin territory lacks auto-regulatory flow control, and therefore sympathetic activation impairs  
161 skin perfusion during circulatory dysfunction [26], a process that could be evaluated by peripheral  
162 perfusion assessment. Indeed, peripheral perfusion can be easily evaluated in many ways at  
163 bedside [26] and, therefore, could be a valuable monitoring tool in any setting. The presence of a  
164 cold clammy skin, mottling or CRT are frequently described as indications to initiate fluid  
165 resuscitation in patients with sepsis-related acute circulatory dysfunction [26]

166 The concept of CRT, the most relevant parameter, is based on this assumption. It was proposed  
167 initially in trauma patients but some negative studies that found no correlation with systemic

168 hemodynamics precluded further research on this variable [26]. More recently however, Lima et al  
169 found that abnormal peripheral perfusion is associated with hyperlactatemia and organ dysfunctions  
170 in critically ill patients [26]. Other authors confirmed this finding and built up a robust body of  
171 evidence supporting the strong prognostic value of abnormal peripheral perfusion in the ICU context  
172 [26].

173 We observed that CRT was the first parameter to be normalized in a cohort of septic shock patients  
174 and this predicted lactate normalization at 24h and survival [8]. Moreover, some recent clinical data  
175 suggest that targeting peripheral perfusion during septic shock resuscitation might improve outcome  
176 [27]. van Genderen et al performed a randomized controlled trial comparing two resuscitation  
177 protocols; one targeted at normal peripheral perfusion and the other to standard management in  
178 thirty critically ill patients [27]. The study demonstrated that targeting peripheral perfusion is safe,  
179 and associated with less fluid administration and organ dysfunctions. Therefore, a parameter like  
180 CRT with a rapid-response time could be very useful to test the response to treatments with strong  
181 physiologic impact such as fluid loading, especially at the emergency department or in resource-  
182 limited settings. In a prospective study performed in a cohort of 100 patients just admitted to the  
183 emergency room, we found that patients exhibiting a normal CRT after initial fluid loading had a  
184 hospital mortality of less than 10% as compared to 55% in patients with abnormal values [28].

185 How can fluid loading and resuscitation improve peripheral perfusion? There is an intricate  
186 relationship between macrohemodynamics and peripheral perfusion. Both are affected by  
187 hypovolemia and tend to improve in parallel in fluid-responsive patients. Their relative changes,  
188 though, are not well correlated. The beneficial effects of fluids and vasoactive drugs may be  
189 explained by an increase in cardiac output or perfusion pressure, a decrease in the neurohumoral  
190 response to hypovolemia, and eventually by direct effects at the microcirculatory level [4, 29].  
191 Whatever the mechanism, normalization of peripheral perfusion parameters appears to indicate a  
192 successful reversal of initial circulatory dysfunction.

193 There are some data that suggest that vasopressor adjustment and/or inodilators could induce  
194 favorable effects on peripheral perfusion or microcirculation under certain circumstances [30-35].  
195 Jhanji et al demonstrated that increasing mean arterial pressure (MAP) to 90 mmHg with  
196 norepinephrine (NE) doses up to 0.41 mcg/kg/min improved cutaneous oxygenation and  
197 microvascular red blood cell flux in a cohort of septic shock patients [30]. The same group obtained  
198 similar results in another cohort of postoperative patients after major abdominal surgery but with an  
199 intervention consisting in stroke volume optimization with fluid challenges and an inodilator  
200 (dopexamine) in fixed dose [31]. Dubin et al demonstrated that rising MAP to 85 mmHg with  
201 incremental doses of NE up to 0.74 mcg/kg/min improved sublingual microcirculatory flow in septic  
202 shock patients with the worst microcirculation at baseline [32]. Dobutamine in fixed doses of 5  
203 mcg/kg/min improved sublingual microcirculatory flow in another cohort of septic shock patients  
204 [33]. On the other hand, active vasodilation with nitroglycerine induced a clear improvement of  
205 peripheral perfusion parameters in a group of shock patients, despite a mean fall in MAP of 14  
206 mmHg [34]. Based on these findings and other data, it was proposed that permissive hypotension  
207 could eventually improve microcirculatory driving-pressure in patients with acute circulatory failure  
208 [35]. In summary, it appears that pharmacological therapies aimed at improving peripheral perfusion  
209 might be individually tailored but could imply increasing or lowering vasopressors and MAP,  
210 inodilators or pure vasodilators according to the clinical context.

211 More recently Brunauer et al, added another important piece of information after performing a pilot  
212 study in 30 septic shock patients subjected to early resuscitation [36]. In this study, CRT and skin  
213 mottling were correlated with the pulsatility index, a sonographic surrogate of vascular tone, of  
214 visceral organs. This means that improvement in peripheral perfusion might move in parallel with  
215 improvement in hepatosplanchnic perfusion, eventually explaining the good prognosis associated  
216 with recovery of CRT and other related parameters [36].

217 Using peripheral perfusion to target resuscitation in septic shock has also several potential  
218 drawbacks. First, there is some degree of subjectivity and inter-observer variability in some of the

219 parameters used to assess it such as CRT and mottling. Second, it cannot be evaluated in some  
220 settings such as dark skin patients. Third, and more importantly, the corpus of evidence that  
221 supports that improvement of peripheral perfusion is associated with resolution of profound tissue  
222 or microcirculatory hypoperfusion, or hypoxia is still scanty.

223 However, the excellent prognosis associated with CRT recovery, the rapid-response time to fluid  
224 loading, the simplicity of its assessment, its availability in limited resource settings, and recent data  
225 suggesting that it might change in parallel to perfusion of physiologically more relevant territories  
226 such as the hepatosplanchnic region [36] constitute a strong fundament to promote studies  
227 evaluating its usefulness to guide resuscitation in septic shock patients.

## 228 ***Why to compare peripheral perfusion with lactate as targets for septic shock resuscitation?***

229 Potential differences between peripheral perfusion and lactate as targets for fluid resuscitation are  
230 outlined in table 1. Summarizing the theoretical background stated above, it is plausible that  
231 normalization of peripheral perfusion as compared to normalization or a rapid decrease (>20%/2h)  
232 of lactate might be associated with less fluid resuscitation and secondarily less positive 24h fluid  
233 balances. Eventually, less positive fluid balances might be associated with less organ dysfunctions.  
234 In addition, peripheral perfusion targeted-resuscitation might be also associated with less  
235 vasopressor load and inodilator use thus preventing other set of potential complications such as  
236 hepatosplanchnic hypoperfusion, arrhythmias or myocardial ischemia. At the end, this could result  
237 in less mortality for a combination of the previous reasons.

## 238 ***B. Project outline***

### 239 ***Hypothesis***

240 Peripheral perfusion guided resuscitation in septic shock is associated with lower mortality, less  
241 organ dysfunctions, less mechanical ventilation (MV), less vasopressor load, and less renal  
242 replacement therapies than a lactate-targeted resuscitation strategy.

243

### 244 ***Design***

245 Multicenter, open-label randomized controlled study, conducted under supervision of an  
246 independent Data Safety Monitoring Committee (DSMC).

247

### 248 ***Main Objective***

249 To test if peripheral perfusion targeted resuscitation in septic shock is associated with lower 28-day  
250 mortality than a lactate targeted resuscitation.

### 251 ***Primary Outcome***

252 All-cause 28-day mortality

### 253 ***Secondary and tertiary outcomes***

254 Need of MV

255 Need of renal replacement therapies (RRT)

256 Days free of MV, vasopressors and RRT in 28-days  
257 Sequential Organ Failure Assessment (SOFA) [37] at 8, 24, 48 and 72h  
258 Acute kidney injury (AKI) [38]  
259 Intra-abdominal hypertension  
260 Resuscitation fluids at 8h  
261 Fluid balances at 8, 24, 48 and 72h  
262 All-cause hospital and 90-day mortality  
263 ICU and hospital length of stay

264

## 265 ***I. Patients***

### 266 ***Inclusion Criteria***

267 Adult patients ( $\geq 18$  years) will be screened for the following inclusion criteria:

268 Septic shock diagnosed at ICU admission according to the Sepsis-3 Consensus Conference [39]. In  
269 short, they correspond to septic patients with hypotension requiring NE to maintain a MAP of  $\geq 65$   
270 mmHg, and serum lactate levels  $> 2$  mmol/l after initial fluid resuscitation with at least 20/ml kg in  
271 one hour.

272

### 273 ***Exclusion Criteria***

- 274 1. Pregnancy
- 275 2. Anticipated surgery or dialysis procedure during the first 8h after septic shock diagnosis
- 276 3. Do-not-resuscitate status
- 277 4. Child B or C liver cirrhosis
- 278 5. Active bleeding
- 279 6. Acute hematological malignancy
- 280 7. Severe concomitant acute respiratory distress syndrome
- 281 8. More than 4h after officially meeting septic shock criteria

## 282 ***II. Randomization***

283 Recruited patients will be randomized to a peripheral perfusion-targeted resuscitation (PPTR) with a  
284 goal of normalizing CRT, or a lactate-targeted resuscitation (LTR) with a goal of either normalizing  
285 lactate or achieving a  $>20\%$  decrease per hour during the 8h study period (Figure 1).

286 A randomization sequence with an allocation of 1:1 will be generated by a computer program.  
287 Study-group assignment will be performed by means of randomized permuted blocks of eight.  
288 Allocation concealment will be maintained by means of central randomization.

289 Investigators at the sites will call a representative of the Study Coordinating Center (SCC) available  
290 24 hours a day, 7 days a week, through a dedicated phone number. The group to which the patient  
291 is allocated will only be disclosed after the information is checked and recorded. Such a measure



292 prevents the investigator and the medical team from predicting to which treatment group the patient  
293 will be allocated.

294

### 295 **III. Assessments**

#### 296 **Baseline**

297 Demographics, comorbidities, acute physiology and chronic health evaluation (APACHE) II [40],  
298 sepsis source and treatment.

299 pre-ICU resuscitation and fluid balance.

300 SOFA + AKI criteria.

301

302 Hemodynamics: heart rate, systolic blood pressure, diastolic blood pressure, MAP, central venous  
303 pressure (CVP), dynamic predictors of fluid responsiveness, intraabdominal pressure, NE dose,  
304 diuresis.

305 Perfusion: lactate, ScvO<sub>2</sub>, P(cv-a)CO<sub>2</sub>, hemoglobin, central venous and arterial blood gases, CRT,  
306 mottling score.

#### 307 **Evolution**

308 SOFA and AKI criteria at 8, 24, 48 and 72h

309 Hemodynamics hourly up to 8h

310 Fluid administration and balance at 8, 24, 48 y 72h

311 Complete perfusion assessment when the targeted parameter is normalized and then at 8, 24, 48  
312 and 72h

313 Register of vasoactive drugs and dobutamine/milrinone use

314 Register of MV and RRT

315 Source control re-analysis at 4h

316 Adjuvant therapies: high-volume hemofiltration, vasopressin, epinephrine, steroids, others

317 Echocardiography recommended at least once during the study period

318 Follow-up till 28 days for use of MV, RRT and vasopressors

319 All-cause mortality at hospital discharge, 28 and 90 days

320 Cause of death

321

### 322 **IV. Principles of general management**

323 Sepsis source identification and treatment should be pursued as a priority of first line treatment. A  
324 central venous catheter and an arterial line will be inserted in all, and the use of a pulmonary artery  
325 catheter or a pulse contour continuous cardiac output device is recommended for patients with a  
326 past medical history of heart failure or with concomitant acute respiratory distress syndrome.

327 Echocardiography will be performed routinely as soon as possible after admission to evaluate basal  
328 cardiac function and repeated as necessary to aid in assessing preload status through inferior vena  
329 cava distensibility when necessary.

330 NE will be the vasopressor of choice and adjusted to a MAP  $\geq$  65 mmHg in all patients.

331 Hemoglobin concentrations will be maintained at 8 g/dl or higher to optimize arterial O<sub>2</sub> content.  
332 Mechanical ventilation settings will be adjusted according to current recommendation. Rescue  
333 therapies such as epinephrine, vasopressin analogues, steroids or different blood purification  
334 techniques like high-volume hemofiltration will be decided following usual practice of the involved  
335 centers in patients evolving with refractory septic shock.

### 336 ***C. Study protocol***

337 A sequential approach to resuscitation will be followed in both groups as shown in Figure 2 and in  
338 Figure S1.

339 Time 0 is the starting point when after randomization, a central venous catheter and an arterial line  
340 are in place, and the basal measurements are performed including hemodynamics and blood  
341 sampling.

342 The study period will be of 8 hours. After this, attending intensivists may continue to treat patients  
343 according to their usual practice or department protocol.

344

#### 345 ***I. Tests and Procedures during the study period***

##### 346 ***Capillary refill time assessment***

347 CRT will be measured by applying firm pressure to the ventral surface of the right index finger distal  
348 phalanx with a glass microscope slide. The pressure will be increased until the skin is blank and  
349 then maintained for 10 seconds. The time for return of the normal skin color will be registered with a  
350 chronometer, and  $> 3$  seconds is defined as abnormal.

351

##### 352 ***Lactate measurements***

353 A normal serum lactate value is defined as less than 2 mmol/l. Lactate will be assessed with the  
354 technique more easily available for each center, including arterial serum levels point-of-care or  
355 common gas analyzers at the central lab, or capillary levels with lactate scout strips.

356

##### 357 ***Fluid responsiveness***

358 This is the first step [41]. Fluid responsiveness will be assessed with a structured approach as  
359 detailed in Figure 3. Basically, dynamic predictors will be evaluated depending on the patient  
360 background status.

361 In sedated and adapted mechanically ventilated patients without arrhythmias, pulse pressure  
362 variation (PPV) or stroke volume variation (SVV) will be used as first choice. A fluid responsive  
363 status is established with values  $\geq 13\%$  and  $10\%$ , respectively. If negative, PPV and SVV will be  
364 reassessed after transiently increasing tidal volume to 8 ml/kg (one minute). An increase  $>3.5\%$  and  
365  $2.5\%$  in PPV or SVV, respectively will be considered as fluid responsive.

366 In patients with arrhythmia, the preferred tests will be the end expiratory occlusion test with a 15 sec  
367 pause ( $>$  pulse pressure  $>5\%$  considered as positive), or echocardiography assessing inferior vena  
368 cava distensibility index ( $>15\%$  considered as positive) [41].

369 In spontaneous breathing patients or non-sedated patients under MV, a passive leg rising (PLR)  
370 maneuver will be performed with an early increase ( $<1$ min) in pulse pressure being  $>10\%$  considered  
371 as fluid responsive. If this is not obtained, and to rule out a false negative response, the maneuver  
372 will be repeated assessing aortic velocity time integral with echocardiography before and after PLR  
373 with a  $>15\%$  increase in this variable accepted as indicating fluid responsiveness [41].

#### 374 **Fluid Challenge**

375 In fluid-responsive patients the first resuscitation step is to administer a fluid bolus of 500 ml of  
376 crystalloids every 30 min until CRT is normalized in PPTR, or dynamic predictors becomes negative  
377 in LTR. Fluid responsiveness and CVP will be assessed before and after each bolus in both groups.

#### 378 **Safety measures during fluid challenges**

379 CVP and fluid responsiveness will be reevaluated after any fluid challenge. If CVP increases  $<5$   
380 mmHg and the patient is still fluid responsive, another fluid bolus will be administered and so on  
381 while the goal is not reached.

382 If CVP increases  $\geq 5$  mmHg or a state of fluid unresponsiveness is reached, fluids will be stopped,  
383 and the patient will be moved to the next step.

384

#### 385 **Vasopressor test**

386 In fluid unresponsive patients with persistent abnormal CRT or with a still abnormal lactate that  
387 decreased  $<20\%/2h$ , a vasopressor test will be performed.

388 In previously hypertensive patients, MAP will be increased to the range of 80-85 mmHg by  
389 transiently rising NE doses. CRT and lactate will be rechecked (CRT at 1 hour and lactate at 2  
390 hours). If CRT is normal in the group A, or lactate normalizes or decreases  $>20\%$  in group B,  
391 resuscitation will be stopped, and NE dose maintained. If not, NE will be reduced to the pre-test  
392 doses, and the protocol moves to the next step.

393 In all the other patients, MAP will be maintained at the 65 mmHg level by decreasing NE doses.

#### 394 **Use of inodilators**

395 Dobutamine 5 mcg/kg/min or milrinone 0.25 mcg/kg/min in fixed doses will be started, and CRT or  
396 lactate rechecked (CRT at 1 hour and lactate at 2 hours). If the goals are not reached, drugs will be  
397 discontinued and no further action will be taken during the study period, except rechecking fluid  
398 responsiveness every hour and restarting fluid challenges if patients resumes a fluid responsive  
399 status. In responders to inodilators (same as with the vasopressor test), the drug will be continued  
400 throughout the study period.

401 As a safety measure, inodilators will be stopped if heart rate increases >15%, or arrhythmias,  
402 ischemia or hypotension develop.

403

404 ***Group A. Management of peripheral perfusion-targeted resuscitation.***

405 In this group, the goal is to normalize CRT by following the next steps in the given order:

406 1. Assessment of fluid responsiveness

407 2. Fluid challenges until CRT is normal, the patient is fluid unresponsive or a safety measure is met

408 3. Vasopressor test

409 4. Inodilator test

410 As a safety measure, resuscitation will be stopped even with normal CRT, only in the presence of  
411 stable macrohemodynamics as demonstrated by heart rate <120 BPM, and stable MAP with no  
412 increase in vasopressors during the last hour.

413 After CRT normalization at any step, CRT will be reassessed hourly during the study period. At any  
414 point, if CRT turns abnormal the resuscitation sequence will be restarted.

415

416 ***Group B. Management of lactate-targeted resuscitation.***

417 In this group the goal is to normalize lactate levels or get a decrease rate of at least 20% in 2 hours,  
418 by following the next steps in the proposed order, always reevaluating lactate at 2-hours intervals.

419 1. Assessment of fluid responsiveness

420 2. Fluid challenges until patients get a fluid unresponsive state or a safety CVP limit is reached  
421 during the 2-hour intervals between lactate assessments.

422 3. Vasopressor test

423 4. Inodilators

424 Lactate will be assessed every two hours during the 8-hours study period. If after obtaining the  
425 lactate goal, lactate gets abnormal again or the decrease rate turns <20% in 2 hours at any of the  
426 following 2-hour controls during the study period, the resuscitation sequence will be restarted.

427 ***D. Other aspects***

428 ***Safety measures***

429 The protocol can be stopped at any moment for safety considerations during the 8-h study period if  
430 the attending intensivist considers that the patient has developed unexpected and severe  
431 complications or evolves into refractory shock, conditions that under his judgment require  
432 liberalization of management. This action must be reported on the case report form, and the patient  
433 will be followed up with major outcomes, and included in the intention-to-treat analysis. Specific  
434 safety measures for fluid administration, vasopressor test and inodilator use are specified above.

435 ***Suspected unexpected serious adverse reactions (SUSAR)***

436 Any adverse event that occurs in a clinical trial subject, which is assessed by the study investigator  
437 as being unexpected, serious and as having a reasonable possibility of a causal relationship with  
438 the study procedure will be reported. Reports of these reactions are subject to expedited  
439 submission to health authorities. SUSAR's will be analyzed by the SCC and DSMC.

440 ***Blinding***

441 Since the intervention will be administered to critically ill patients (mostly sedated), blinding of these  
442 patients is not necessary. Because this is a non-pharmacological intervention, blinding of the  
443 medical team is not feasible.

444 ***Quality control***

445 Several procedures will assure data quality, including (1) all investigators will attend a training  
446 session before the start of the study to standardize procedures, including data collection (2) the  
447 investigators may contact the SCC to solve issues or problems that may arise; (3) case report forms  
448 provided by the centers will be subjected to various checks by members of the SCC for missing  
449 data, plausible, possible or non-permitted value ranges, and logic checks on a weekly basis. (4)  
450 centers will be notified of the inconsistencies or missing data as queries and asked to correct them;  
451 (5) the SCC will review detailed reports on screening, enrollment, follow-up, inconsistencies and  
452 completeness of data. Immediate actions will follow to solve problems that arise; (6) only after the  
453 case report forms are cleared by the SCC, data will be entered in the final electronic database by  
454 the data digitizer.

455 ***Ethical aspects***

456 Each investigator center will submit the study protocol to its Institutional Review Board (IRB). The  
457 study will start only after being approved by the IRB. Written informed consent will be obtained from  
458 a legal representative of all participants. This study follows local and international declarations.

459 ***Trial organization and management***

460 A team based on the Departamento de Medicina Intensiva, Facultad de Medicina of the Pontificia  
461 Universidad Católica, Chile, will manage the trial on a day-to-day basis. The SCC is comprised by  
462 the chief and co-chair investigators, four project managers, a statistician and a data digitizer. The  
463 statistician is based on the Research Institute HCor, São Paulo, Brazil.

464 The responsibilities of the SCC include: 1. Planning and conducting the study designing the  
465 protocol; designing the case report form; designing the operation guide; managing and controlling  
466 data quality; designing, testing and maintaining the electronic database; data quality control;  
467 assisting the steering committee; 2. Managing the research centers selecting and training the  
468 research centers; helping the centers prepare a regulatory report to be submitted to the IRBs and  
469 assisting the centers with the submission; monitoring recruitment rates and the actions to increase  
470 recruitment; monitoring follow-up and implementing actions to prevent follow-up losses; auditing;  
471 sending study materials to the research centers; producing a monthly study newsletter; developing  
472 supporting material for the study.

473 ***Trial Steering Committee***

474 The Trial Steering Committee is responsible for the overall study supervision, assisting in  
475 developing the study protocol and preparing the final manuscript. All other study committees report  
476 to this committee. Its members are investigators trained in designing and conducting randomized  
477 clinical trials in critically ill patients.

478 **Data Safety Monitoring Committee**

479 The DSMC is set up with independent epidemiologists and intensivists that supervises the trial. It  
480 also might provide recommendations for the SCC of continuing the study as planned or  
481 discontinuing the recruitment based on evidence that the intervention causes increased mortality in  
482 the experimental group (PPTR) as compared to the control group (LTR). Interim analyses will be  
483 conducted after recruitment of the first 100 patients and at 75% of the sample. In addition, the  
484 DSMC will discuss and potentially recommend a re-estimation of the sample size according to the  
485 interim analysis after recruitment of 75% of the patients.

486

487 **Study centers**

488 The study centers for ANDROMEDA-SHOCK were selected through a rigorous process. This  
489 started with a survey of professional and technical resources as well as processes of care. Centers  
490 were contacted trying to make this process representative across public, private and university  
491 hospitals, different countries and cultures, and hospital size.

492 At the end, 34 centers were selected and all applied for ethical approval, leaving finally 28 active  
493 centers. Details of the investigators and centers are provided in the Supplementary Appendix.

494 **Funding**

495 The study will be funded by the Departamento de Medicina Intensiva, Facultad de Medicina,  
496 Pontificia Universidad Católica, Chile.

497 **E. Sample size**

498 Mortality in patients with increased lactate levels in circulatory dysfunction has been shown to  
499 exceed 40% [22]. In addition, several studies have shown that abnormal peripheral perfusion is  
500 associated with a mortality exceeding 40% [28, 42].

501 We will enroll 420 patients. With these sample size the study will have 90% power to detect a  
502 reduction in 28-day mortality from 45% to 30%, at a significance level of 5%, considering time-to-  
503 event analysis. We considered a decrease of 15% in mortality to have a direct clinical  
504 implementation effect. Similar effects on mortality have been shown in early resuscitation studies. In  
505 addition, limiting fluid administration in patients with septic shock and normal peripheral perfusion  
506 has been shown to decrease organ failure, which is the leading cause of death in these patients  
507 [22, 27].

508 Considering a smaller decrease in mortality (e.g. 10%), this sample size would only have 57%  
509 power to detect benefit. Therefore, we will use an adaptive approach that will allow for a sample-  
510 size re-estimation at the interim analysis when 75% of the sample has been recruited. The sample-  
511 size re-estimation will be conducted by the DSMC if the effect size observed in the interim analysis  
512 is between 10% and <15% absolute reduction in mortality [43].

513 **F. Statistical analysis plan**

514 A detailed statistical analysis plan will be prepared before proceeding to patient enrolment. The  
515 essential characteristics of this statistical analysis plan are described on S2 file.

516

517

519 **References**

- 520 1. Vincent JL, De Backer D. Circulatory shock. *N Engl J Med* 2013;369:1726–34
- 521 2. Cecconi M, De Backer D, Antonelli M, et al. Consensus on circulatory shock and  
522 hemodynamic monitoring. Task force of the European Society of Intensive Care  
523 Medicine. *Intensive Care Med* 2014; 40:1795–1815
- 524 3. Dougnac AL, Mercado MF, Cornejo RR, et al. Prevalence of severe sepsis in intensive  
525 care units. A national multicentric study. *Rev Med Chil* 2007;135: 620-30
- 526 4. Hernandez G, Bruhn A, Castro R, Regueira T. The holistic view on perfusion monitoring  
527 in septic shock. *Curr Opinion Crit Care* 2012;18:280-6.
- 528 5. Dellinger RP, Levy MM, Rhodes A, et al. Surviving sepsis campaign: International  
529 guidelines for management of severe sepsis and septic shock. *Intensive Care Med*  
530 2013;39:165–228.
- 531 6. Garcia-Alvarez M, Marik P, Bellomo R. Sepsis-associated hyperlactatemia. *Crit Care*  
532 2014;18:503.
- 533 7. Tapia P, Soto D, Bruhn A, et al. Impairment of exogenous lactate clearance in  
534 experimental hyperdynamic septic shock is not related to total liver hypoperfusion. *Crit*  
535 *Care* 2015;19:188
- 536 8. Hernandez G, Pedreros C, Veas E, et al. Evolution of peripheral vs metabolic perfusion  
537 parameters during septic shock resuscitation. A clinical-physiologic study. *J Crit Care*  
538 2012;27:283-88.
- 539 9. Hernandez G, Castro R, Romero C, et al. Persistent sepsis-induced hypotension  
540 without hyperlactatemia: is it really septic shock? *J Crit Care* 2011;26:435.e9-14.
- 541 10. Hernandez G, Bruhn A, Castro R, et al. Persistent Sepsis-Induced Hypotension without  
542 Hyperlactatemia: A Distinct Clinical and Physiological Profile within the Spectrum of  
543 Septic Shock. *Crit Care Res Pract* 2012:536852.
- 544 11. Hernandez G, Regueira T, Bruhn A, et al. Relationship of systemic, hepatosplanchnic,  
545 and microcirculatory perfusion parameters with 6-hour lactate clearance in  
546 hyperdynamic septic shock patients: an acute, clinical-physiological, pilot study. *Ann*  
547 *Intensive Care* 2012;2:44.
- 548 12. Hernandez G, Boerma EC, Dubin A, et al. Severe abnormalities in microvascular  
549 perfused vessel density are associated to organ dysfunctions and mortality and can be  
550 predicted by hyperlactatemia and norepinephrine requirements in septic shock patients.  
551 *J Crit Care* 2013;28:538.e9-14.
- 552 13. Hernandez G, Bruhn A, Luengo C, et al. Effects of dobutamine on systemic, regional  
553 and microcirculatory perfusion parameters in septic shock: a randomized, placebo-  
554 controlled, double-blind, crossover study. *Intensive Care Med* 2013;39:1435-43.
- 555 14. Ospina-Tascón GA, Bautista-Rincón DF, Umaña M, et al. Persistently high venous-to-  
556 arterial carbon dioxide differences during early resuscitation are associated with poor  
557 outcomes in septic shock. *Crit Care* 2013;17:R294.
- 558 15. Ospina-Tascón GA, Umaña M, Bermúdez W, et al. Combination of arterial lactate levels  
559 and venous-arterial CO<sub>2</sub> to arterial-venous O<sub>2</sub> content difference ratio as markers of  
560 resuscitation in patients with septic shock. *Intensive Care Med* 2015;41:796–805.
- 561 16. Ospina-Tascón GA, Umaña M, Bermúdez WF, et al. Can venous-to-arterial carbon  
562 dioxide differences reflect microcirculatory alterations in patients with septic shock?  
563 *Intensive Care Med* 2016;42:211-21.
- 564 17. Hernandez G, Tapia P, Alegría L, et al. Effects of dexmedetomidine and esmolol on  
565 systemic hemodynamics and exogenous lactate clearance in early experimental septic  
566 shock. *Crit Care* 2016;20:234.
- 567 18. Hernandez G, Luengo C, Bruhn A, et al. When to stop septic shock resuscitation: clues  
568 from a dynamic perfusion monitoring. *Ann Intensive Care* 2014; 4:30.
- 569 19. Malbrain ML, Marik PE, Witters I, et al. Fluid overload, de-resuscitation, and outcomes  
570 in critically ill or injured patients: a systematic review with suggestions for clinical  
571 practice. *Anaesthesiol Intensive Ther* 2014;361-80.

- 572  
573  
574  
575  
576  
577  
578  
579  
580  
581  
582  
583  
584  
585  
586  
587  
588  
589  
590  
591  
592  
593  
594  
595  
596  
597  
598  
599  
600  
601  
602  
603  
604  
605  
606  
607  
608  
609  
610  
611  
612  
613  
614  
615  
616  
617  
618  
619  
620  
621  
622  
623  
624  
625  
626  
627
20. Marik PE. Iatrogenic salt water drowning and the hazards of a high central venous pressure. *Ann Intensive Care* 2014;4:21.
  21. Gu WJ, Zhang Z, Bakker J. Early lactate clearance-guided therapy in patients with sepsis: a meta-analysis with trial sequential analysis of randomized controlled trials. *Intensive Care Med* 2015;41:1862-3.
  22. Jansen TC, van Bommel J, Schoonderbeek FJ, et al. Early lactate-guided therapy in intensive care unit patients: a multicenter, open-label, randomized controlled trial. *Am J Respir Crit Care Med* 2010;182:752-61.
  23. Jones AE, Shapiro NI, Trzeciak S, et al. Lactate clearance vs central venous oxygen saturation as goals of early sepsis therapy: a randomized clinical trial. *JAMA* 2010; 303:739-46.
  24. Bakker J, de Backer D, Hernandez G. Lactate-guided resuscitation saves lives: we are not sure. *Intensive Care Med* 2016;42:472-74.
  25. Vallée F, Vallet B, Mathe O, et al. Central venous-to-arterial carbon dioxide difference: an additional target for goal-directed therapy in septic shock? *Intensive Care Med* 2008; 34:2218–25.
  26. Lima A, Bakker J. Clinical assessment of peripheral circulation. *Curr Opin Crit Care* 2015; 21:226–31.
  27. van Genderen ME, Engels N, van der Valk RJP, et al. Early peripheral perfusion-guided fluid therapy in patients with septic shock. *Am J Respir Crit Care Med* 2015;191:477–80.
  28. Lara B, Enberg L, Ortega M, et al. Capillary refill time during fluid resuscitation in patients with sepsis-related hyperlactatemia at the emergency department is related to mortality. *PLoS One* 2017;12: e0188548.
  29. Hernandez G, Teboul JL. Is the macrocirculation really dissociated from the microcirculation in septic shock? *Intensive Care Med* 2016; 42:1621-4.
  30. Jhanji S, Stirling S, Patel N, Hinds CJ, Pearse RM. The effect of increasing doses of norepinephrine on tissue oxygenation and microvascular flow in patients with septic shock. *Crit Care Med* 2009;37:1961-6.
  31. Jhanji S, Lee C, Watson D, Hinds C, Pearse RM. Microvascular flow and tissue oxygenation after major abdominal surgery: association with post-operative complications. *Intensive Care Med* 2009;35:671-7.
  32. Dubin A, Pozo MO, Casabella CA, et al. Increasing arterial blood pressure with norepinephrine does not improve microcirculatory blood flow: a prospective study. *Crit Care* 2009;13:R92.
  33. De Backer D, Creteur J, Dubois MJ, et al. The effects of dobutamine on microcirculatory alterations in patients with septic shock are independent of its systemic effects. *Crit Care Med* 2006;34:403-8.
  34. Lima A, van Genderen ME, van Bommel J, et al. Nitroglycerin reverts clinical manifestations of poor peripheral perfusion in patients with circulatory shock. *Crit Care* 2014;18:R126.
  35. Dünser MW, Takala J, Brunauer A, J Bakker. Re-thinking resuscitation: leaving blood pressure cosmetics behind and moving forward to permissive hypotension and a tissue perfusion-based approach. *Crit Care* 2013;17:326.
  36. Brunauer A, Koköfer A, Bataar O, et al. Changes in peripheral perfusion relate to visceral organ perfusion in early septic shock: A pilot study. *J Crit Care* 2016;35:105-9.
  37. Vincent JL, Moreno R, Takala J, et al. The SOFA (Sepsis-related Organ Failure Assessment) score to describe organ dysfunction/failure. On behalf of the Working Group on Sepsis-Related Problems of the European Society of Intensive Care Medicine. *Intensive Care Med* 1996;22:707-10.
  38. Kellum JA, Lameire N. KDIGO AKI Guideline Work Group. Diagnosis, evaluation, and management of acute kidney injury: a KDIGO summary (Part 1). *Crit Care* 2013;17:204.
  39. Singer M, Deutschman CS, Seymour CW, et al. The third international consensus definitions for sepsis and septic shock (Sepsis-3). *JAMA* 2016;315:801–10.
  40. Knaus WA, Draper EA, Wagner DP, Zimmerman JE. APACHE II: a severity of disease classification system. *Crit Care Med* 1985;13:818–29.



628 41. Monnet X, Marik PE, Teboul JL. Prediction of fluid responsiveness: an update. *Ann*  
629 *Intensive Care* 2016;6:111.

630 42. Ait-Oufella H, Bakker J. Understanding clinical signs of poor tissue perfusion during  
631 septic shock. *Intensive Care Medicine* 2016;42:2070-72.

632 43. Bhatt DL, Mehta C. Adaptive Designs for Clinical Trials. *N Engl J Med* 2016; 375:65-74.

633 44. Gamble C, Krishan A, Stocken D, et al. Guidelines for the Content of Statistical Analysis  
634 Plans in Clinical Trials. *JAMA* 2017;318:2337-43.

635 45. Singer M, Deutschman CS, Seymour CW, et al. The third international consensus  
636 definitions for sepsis and septic shock (Sepsis-3). *JAMA* 2016;315:801–10.

637 46. Lima A, Bakker J. Clinical assessment of peripheral circulation. *Curr Opin Crit Care*  
638 2015; 21:226–31.

639 47. Rivers E, Nguyen B, Havstad S, et al. Early goal-directed therapy in the treatment of  
640 severe sepsis and septic shock. *N Engl J Med* 2001;345):1368-77.

641 48. van Genderen ME, Engels N, van der Valk RJ, et al. Early peripheral perfusion-guided  
642 fluid therapy in patients with septic shock. *Am J Respir Crit Care Med* 2015;191:477-80.

643 49. Bhatt DL, Mehta C. Adaptive Designs for Clinical Trials. *N Engl J Med* 2016;375:65 74.

644 50. Vincent JL, Moreno R, Takala J, et al. The SOFA (Sepsis-related Organ Failure  
645 Assessment) score to describe organ dysfunction/failure. On behalf of the Working  
646 Group on Sepsis-Related Problems of the European Society of Intensive Care  
647 Medicine. *Intensive Care Med* 1996;22:707-10.

648 51. Knaus WA, Draper EA, Wagner DP, Zimmerman JE. APACHE II: a severity of disease  
649 classification system. *Crit Care Med* 1985;13:818–29.

651

|                                                             | <b>Peripheral Perfusion</b> | <b>Lactate</b> |
|-------------------------------------------------------------|-----------------------------|----------------|
| Prognostic factor                                           | ++                          | +++            |
| Demonstrated association with profound tissue hypoperfusion | +                           | +++            |
| Specificity as a marker of tissue hypoperfusion             | ++                          | +              |
| Real-time assessment of response to fluids                  | +++                         | +              |
| Availability                                                | +++                         | +              |
| Simplicity                                                  | +++                         | +              |
| Faster dynamics of recovery                                 | +++                         | +              |

652

653

654

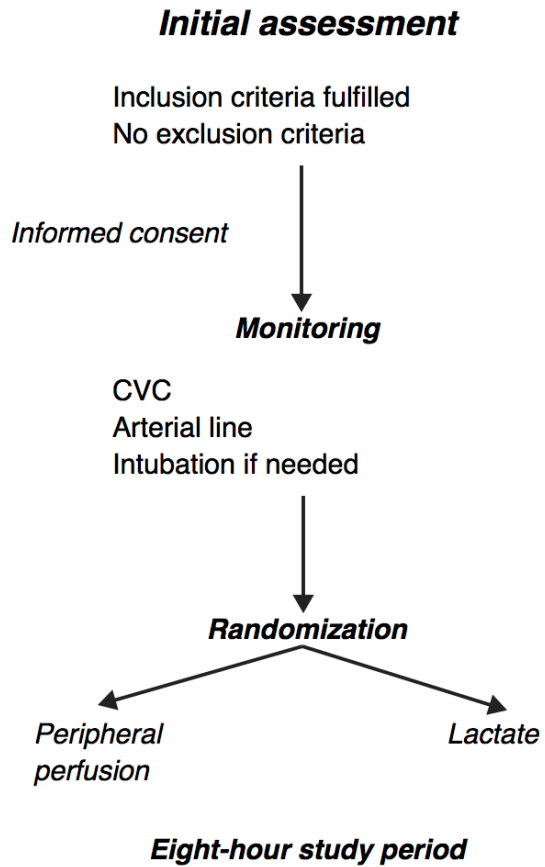

655

656 **Figure 1. Pre-randomization phase assessments and interventions.**

657

**Fluid responsiveness**

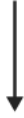

**Vasopressor testing**

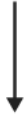

**Inodilators**

658

659

660

661 **Figure 2. Sequential approach to optimize resuscitation based on perfusion goals.**

662

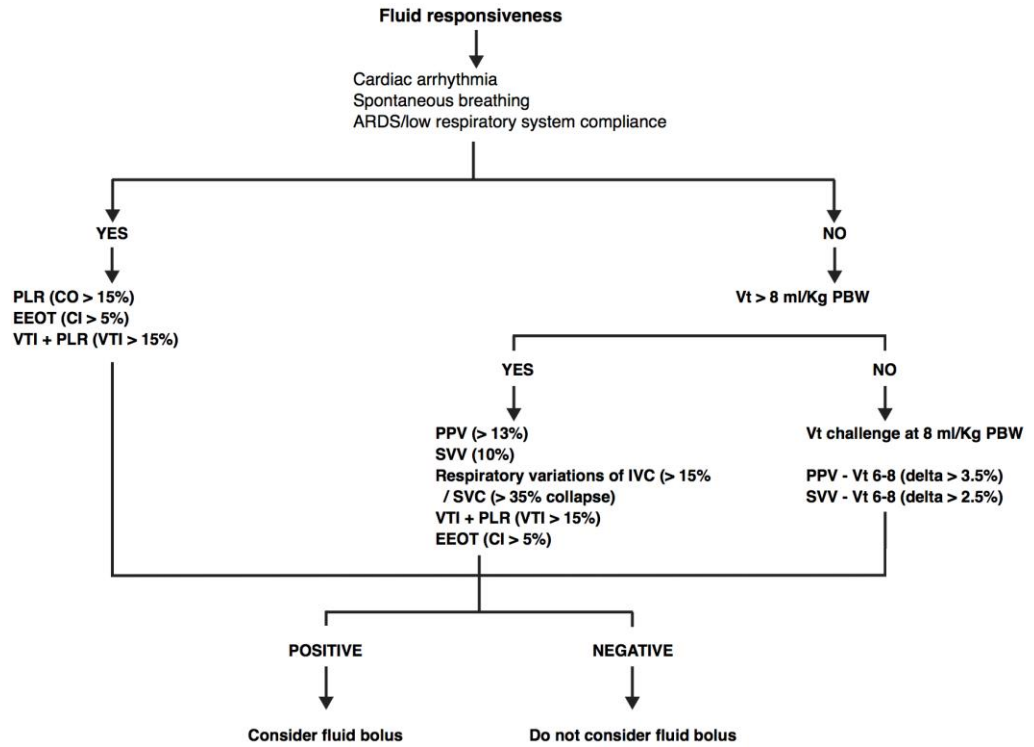

663  
664  
665  
666  
667  
668  
669  
670  
671

**Figure 3. Assessment of fluid responsiveness during the study period.**

ARDS acute respiratory distress syndrome; PLR passive leg rising; CO cardiac output; EEOT end-expiratory occlusion test; CI cardiac index; VTI velocity time integral; Vt tidal volume, PBW predicted body weight; PPV pulse pressure variation; SVV stroke volume variation, IVC inferior vena cava; SVC superior vena cava

672

673 **S2. THE ANDROMEDA-SHOCK STUDY STATISTICAL ANALYSIS PLAN**

674

675 The Statistical Analysis Plan was accepted for publication by RBTI on May 11, 2018 and is  
676 accessible on (<https://www.ncbi.nlm.nih.gov/pubmed/30066731>)

677 The Statistical Analysis Plan was developed following appropriate guidelines [1] prior to locking the  
678 trial database and starting analyses.

679 The trial protocol (version 1.0 from December, 2016) was submitted and published, is registered  
680 with ClinicalTrials.gov (NCT03078712), and was approved by the Institutional Review Boards (IRB)  
681 of all the participant centers.

682 No amendment was performed to the statistical analysis plan since the IRB approval of the first  
683 version of the study.

684

685

686

687 **Abbreviations**

688 APACHE: Acute Physiology and Chronic Health Evaluation

689 CRT: capillary refill time

690 DSMC: Data Safety Monitoring Committee

691 ICU: intensive care unit

692 LTR: lactate-targeted resuscitation

693 PPTR: peripheral perfusion-targeted resuscitation

694 SOFA: Sequential Organ Failure Assessment

695

696 **Framework**

697 The design of the study is aimed at demonstrating superiority of peripheral perfusion targeted  
698 resuscitation (PPTR) over lactate targeted resuscitation (LTR) in terms of 28-day mortality and other  
699 secondary and tertiary outcomes.

700

701 **Sample size calculation**

702 Mortality in patients with increased lactate levels in circulatory dysfunction might exceed 40% [2].  
703 Furthermore, an abnormal peripheral perfusion is associated with mortality greater than 40% as  
704 well, whereas a normal capillary refill time (CRT) in the early phase of septic shock has been linked  
705 to mortality lower than 10% [3]. We anticipate a mortality within 28-days of 45% in the LTR group of  
706 our trial as suggested by the Sepsis-3 Consensus Conference [2].

707 A total sample size of 210 per group (420 patients in total) is expected to provide approximately  
708 90% power to detect a reduction in in 28-day mortality from 45% to 30%, analyzing the data using  
709 the intention-to-treat principle, with a two-sided alpha level of 5%. A 15% reduction in mortality (33%  
710 relative risk reduction) has important clinical value and was observed in earlier resuscitation studies  
711 [4]. In addition, this effect size is plausible because limiting fluid administration has been shown to  
712 decrease organ failure, one of the main determinants of death in septic patients [5].

713 Nevertheless, we used an adaptive approach [6], that would allow for a sample-size re-estimation at  
714 a pre-planned interim analysis, after recruiting 75% of the total sample. The sample-size re-  
715 estimation was supposed to be conducted by the independent Data Safety Monitoring Committee  
716 (DSMC) only if the size effect observed in the interim analysis is between 10% and 15% absolute  
717 reduction in mortality (promising zone), favoring PPTR over LTR [6]. In the interim analysis, a  
718 favorable zone was defined as an absolute difference >15% (conditional power >90%), and an  
719 unfavorable zone, as an absolute difference <10% (conditional power <61%).

720 We calculate operational characteristics of this this strategy conducting simulations with 200  
721 studies. Without adaptation, conditional power for the promising zone is between 61% and 90%. In  
722 case the study interim analysis felt in the promising zone, adapting sample size up to 840 patients  
723 would increase conditional power. Considering a true effect size of 15%, probability of "landing" on  
724 promising zone is 22% and mean conditional power would increase to >90%. Considering a true  
725 effect size of 10%, probability of "falling" on the promising zone is 40% and mean conditional power  
726 would increase to >80%.

727 This interim analysis was performed in February 2<sup>nd</sup>, 2018, and the DSMC recommended to  
728 continue the trial with no modifications.

729 **Statistical interim analyses**

730 Interim analyses were conducted after the inclusion of the first 100 patients and at 75% of the  
731 sample size (300 patients). Only the independent DSMC had access to results of those analyses.  
732 The DSMC is comprised by 5 experienced intensivists and trialists, and 1 senior statistician. The  
733 DSMC established no *a priori* statistical stopping guidance according to efficacy, safety or futility.  
734 The DSMC recommended that the trial should continue without alterations after those analyses.

735 **Timing of final analysis**

736 All outcomes will be analyzed simultaneously after we have completed the 90-day follow-up of all  
737 patients and the database has been locked.

738 **Timing of outcome assessments**

739 We will assess outcomes at 8, 24, 48, and 72 hours; at hospital discharge; and at 28 and 90 days,

740 **Statistical principles**

741 **Confidence intervals and P values**

742 We will present 95% confidence intervals for effect estimates on all primary and secondary  
743 outcomes. All hypothesis tests will be two-sided with  $\alpha$  of 5%. We will not adjust P-values and



744 confidence intervals for analyses of primary or secondary outcomes. Therefore, all results for  
745 secondary outcomes should be interpreted as exploratory.

#### 746 **Adherence and protocol deviations**

747 We will report the numbers and percentages of non-adherence to randomly allocated treatment.

748 Protocol deviations will be assessed and registered by the local coordinators at each center. Major  
749 deviations or violations are defined as wrong inclusion (misjudgment of inclusion or exclusion  
750 criteria) or inadequate resuscitation procedures during the study period.

#### 751 **Analysis populations**

752 All analyses will be conducted according to the intention-to-treat principle.

#### 753 **Analysis**

##### 754 **Outcome definitions**

755 The primary outcome is all-cause mortality within 28 days.

756 The secondary outcomes are:

- 757 - All-cause mortality within 90 days.
- 758 - Mechanical ventilation-free days during the first 28 days after randomization.
- 759 - All type of renal replacement therapy-free days during the first 28 days after randomization.
- 760 - Vasopressor-free days during the first 28 days after randomization.
- 761 - Organ dysfunction assessed with the Sepsis-related Organ Failure Assessment (SOFA) [7]
- 762 score at 72 hours after randomization
- 763 - Intensive care unit (ICU) and hospital lengths of stay, truncated at 90 days.

764 The tertiary exploratory outcomes are:

- 765 - Total resuscitation fluids in the first 8 and 24 hours after randomization.
- 766 - Total fluid balance in the first 8, 24, 48 and 72 hours.
- 767 - Occurrence of intra-abdominal hypertension during the first 72 hours after randomization
- 768 (%), when measured by the attending physician, at his/her discretion when intra-abdominal
- 769 hypertension is suspected.
- 770 - Use of renal replacement therapy (%) within 28 days.
- 771 - In-hospital mortality, truncated at 90 days.

772

##### 773 **Analysis methods**

774 Continuous distribution will be assessed by visual inspection of histograms and D'Agostino-  
775 Pearson's normality tests. Variables will be expressed as counts and percentages, mean and  
776 standard deviation (SD), or median and interquartile range (IQR), whenever appropriate. Linear  
777 mixed models for continuous variables will be carried out where Gaussian error distribution applies  
778 to account for the repeated measurements on the same patient. Binary variables will be tested  
779 using logistic mixed regression models and continuous variables with non-symmetrical distributions,  
780 such as lactate and mottling score, will use the distribution that better fits the data.

781 The effect of PPTR versus LTR on the primary outcome will be analyzed by means of Cox  
782 proportional hazards models, with adjustment for 5 pre-specified baseline covariates: APACHE II  
783 score [8], SOFA score, lactate level, CRT and source of infection, as fixed (individual-level) effects.  
784 Results will be reported as hazard ratios with 95% confidence intervals (CI) and P-values. Kaplan  
785 Meier curves will be presented.

786 Effects on secondary and tertiary outcomes will be presented as hazard ratio for 90-day all-cause  
787 mortality and renal replacement therapy within 28 days, or risk difference for all other binary  
788 outcomes, along with 95% CI and P-values (calculated with Fisher's exact tests). The effect on 90-

789 day all-cause mortality and the need of renal replacement therapy within 28 days will be assessed  
790 with Cox-proportional hazard model, without adjustment for baseline covariates.

791 The effect of both therapies on mechanical ventilation-free days, renal replacement therapy-free  
792 days and vasopressors-free days within 28 days will be analyzed with generalized linear models  
793 using the distribution that best fits the data (possibly truncated Poisson distribution). The impact on  
794 organ dysfunction at 72 hours (measured by SOFA) will be calculated with generalized linear  
795 models with the distribution that better fits the data, adjusting for baseline SOFA. Effects on other  
796 continuous outcomes, such as ICU or hospital length of stay, amount or resuscitation fluids, fluid  
797 balance, will also be calculated with generalized linear models with the distribution that better fits  
798 the data (normal, gamma, inverse Gaussian, or other), without adjustment for covariates.

### 799 **Subgroup analysis**

800 We will use Cox proportional hazards adjusted for baseline covariates (same as main analysis) to  
801 assess interactions between treatment effect and the following prespecified subgroups:

802 a) Patients with lactate > 4.0 mmol/L versus equal or lower than 4 mmol/L

803 b) Patients without a confirmed source of infection (as this could increase the translation of the  
804 study to other critically ill) versus those with confirmed source of infection.

805 c) Patients with APACHE II lower versus equal or higher than 25.

806 d) Patients with SOFA score lower versus equal or higher than 10.

807 e) Patients with a more than 10% difference in lactate levels between the very first one measured  
808 and the baseline when starting the study.

### 809 **Sensitivity analysis**

810 We will assess the effect of PPTR compared to LTR on 28-day mortality using a frailty Cox model  
811 with site as random effect and adjustment for the same baseline co-variables as in the main analysis  
812 (APACHE II score, SOFA score, lactate level, CRT and source of infection).

### 813 **Harms**

814 The primary, secondary and tertiary outcomes are intended to reflect potential harms resulting from  
815 the PPTR versus LTR approach for managing septic shock.

### 816 **Missing data**

817 Primary outcome (28-day mortality) will be treated as time-to-event outcome and reported as Cox  
818 proportional hazard models; patients with loss of follow up will be censored in the last contact. We  
819 will use multiple imputation methods to assess treatment effect on the primary outcome in cases  
820 without follow-up information. As a sensitivity analysis, we will also assess the effect on the primary  
821 outcome using complete case data.

### 822 **Statistical software**

823 Analyses will be performed using the R (R Core Team, 2017, Vienna, Austria) software.

824

### 825 **Conclusion**

826 In accordance with best trial practices, statistical analysis plan and data management plan are  
827 herein reported before the database is locked, and previously to the beginning of the analyses.

828

829

830

831

832

833

834 **REFERENCES**

835

836

837

838

839

840

841

842

843

844

845

846

847

848

849

850

851

852

853

1. Gamble C, Krishan A, Stocken D, et al. Guidelines for the Content of Statistical Analysis Plans in Clinical Trials. *JAMA* 2017;318:2337-43.
2. Singer M, Deutschman CS, Seymour CW, et al. The third international consensus definitions for sepsis and septic shock (Sepsis-3). *JAMA* 2016;315:801–10.
3. Lima A, Bakker J. Clinical assessment of peripheral circulation. *Curr Opin Crit Care* 2015; 21:226–31.
4. Rivers E, Nguyen B, Havstad S, et al. Early goal-directed therapy in the treatment of severe sepsis and septic shock. *N Engl J Med* 2001;345):1368-77.
5. van Genderen ME, Engels N, van der Valk RJ, et al. Early peripheral perfusion-guided fluid therapy in patients with septic shock. *Am J Respir Crit Care Med* 2015;191:477-80.
6. Bhatt DL, Mehta C. Adaptive Designs for Clinical Trials. *N Engl J Med* 2016;375:65-74.
7. Vincent JL, Moreno R, Takala J, et al. The SOFA (Sepsis-related Organ Failure Assessment) score to describe organ dysfunction/failure. On behalf of the Working Group on Sepsis-Related Problems of the European Society of Intensive Care Medicine. *Intensive Care Med* 1996;22:707-10.
8. Knaus WA, Draper EA, Wagner DP, Zimmerman JE. APACHE II: a severity of disease classification system. *Crit Care Med* 1985;13:818–29.

854

855
