# Supplementary material
Source: PubMed Central journal article supplement (PMC6439620)
Supplement: jama-321-654-s002.pdf [file jama-321-654-s002.pdf]

## Supplemental Online Content

Hernández G, Ospina-Tascón GA, Petri Damiani L, et al; ANDROMEDA-SHOCK Investigators and the Latin America Intensive Care Network (LIVEN). Effect of a resuscitation strategy targeting peripheral perfusion status vs serum lactate levels on 28-day mortality among patients with septic shock: the ANDROMEDA-SHOCK randomized clinical trial. *JAMA*. doi:10.1001/jama.2019.0071

### eMethods

**eFigure 1.** Resuscitation Protocol During the Intervention Period

**eFigure 2.** Cumulative Recruitment per Month

**eFigure 3.** Evolution of Fluid Responsiveness State During the 8h Intervention Period

**eFigure 4.** Perfusion Variables From Baseline to 72 Hours in the Peripheral Perfusion and Lactate Groups

**eFigure 5.** Treatment Effect on 28-day Mortality Across Sites

**eTable 1.** Characteristics of Study Centers, Number of Patients Enrolled, and Rate of Enrollment

**eTable 2.** Hemodynamic and Perfusion Variables From Baseline to 72 Hours in the Peripheral and Lactate Groups

**eTable 3.** Protocol Violations and Deviations

**eTable 4.** Use of Vasopressor Test, Inodilator Test, and Adjunctive Drugs for Shock

**eTable 5.** Capillary Refill Time and Lactate levels at Each Time Point During the Intervention Period in Fluid Unresponsive Patients

**eTable 6.** Sensitivity Analyses of the Treatment Effect on the Primary Outcome

This supplementary material has been provided by the authors to give readers additional information about their work.

## **eMethods**

### ***Exclusion Criteria***

1. Pregnancy
2. Anticipated surgery or dialysis procedure during the first 8h after septic shock diagnosis
3. Do-not-resuscitate status
4. Child B or C liver cirrhosis
5. Active bleeding
6. Acute hematological malignancy
7. Severe concomitant acute respiratory distress syndrome
8. More than 4h after officially meeting septic shock criteria

### ***Additional post-hoc sensitivity analyses***

- Intention-to-treat unadjusted Cox proportional hazards model
- Intention-to-treat Cox proportional hazards model adjusted by APACHE II, SOFA, lactate level, CRT, infection source, and intravenous fluid loading per weight before randomization
- Per protocol (8h protocol completed) Cox proportional hazards model, adjusted by APACHE II, SOFA, lactate level, CRT and infection source.
- Per protocol (8h protocol completed) unadjusted Cox proportional hazards model
- Intention-to-treat unadjusted analysis frailty Cox model
- Per protocol (8h protocol completed) frailty Cox model adjusted by APACHE II, SOFA, lactate level, CRT and Infection source.

# eFigures

eFigure 1. Resuscitation Protocol During the Intervention Period

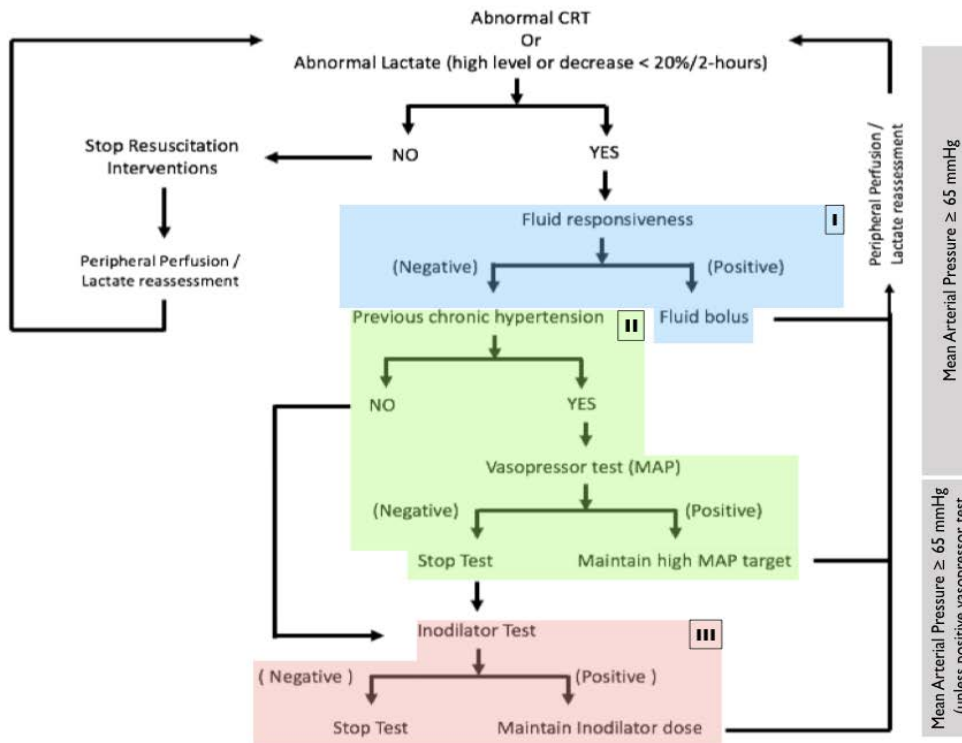

The figure describes the sequential approach to resuscitation. The process starts with fluid loading according to the status of fluid responsiveness (first step). If the goal is not obtained, the second step is a vasopressor test, and then an inodilator test (third step). CRT denotes capillary refill time.

**eFigure 2. Cumulative Recruitment per Month**

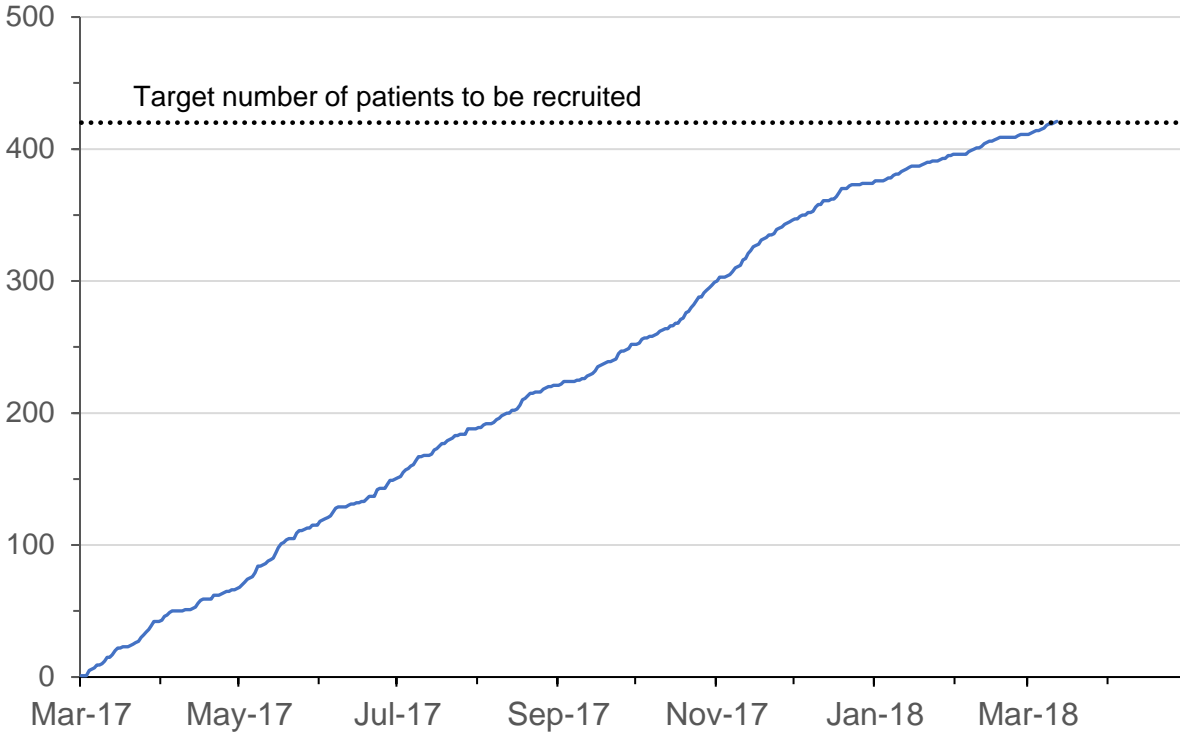

### eFigure 3. Evolution of Fluid Responsiveness State During the 8h Intervention Period

Fluid responsiveness was determined periodically during the intervention period as commanded by the clinical report form and the management algorithm. At baseline, fluid responsiveness was unavailable in 76 patients. The group of patients categorized as with unavailable fluid responsiveness status over-time (0 to 8 hours) was the sum of early deaths and patients in whom it could be not determined mainly because of technical reasons.

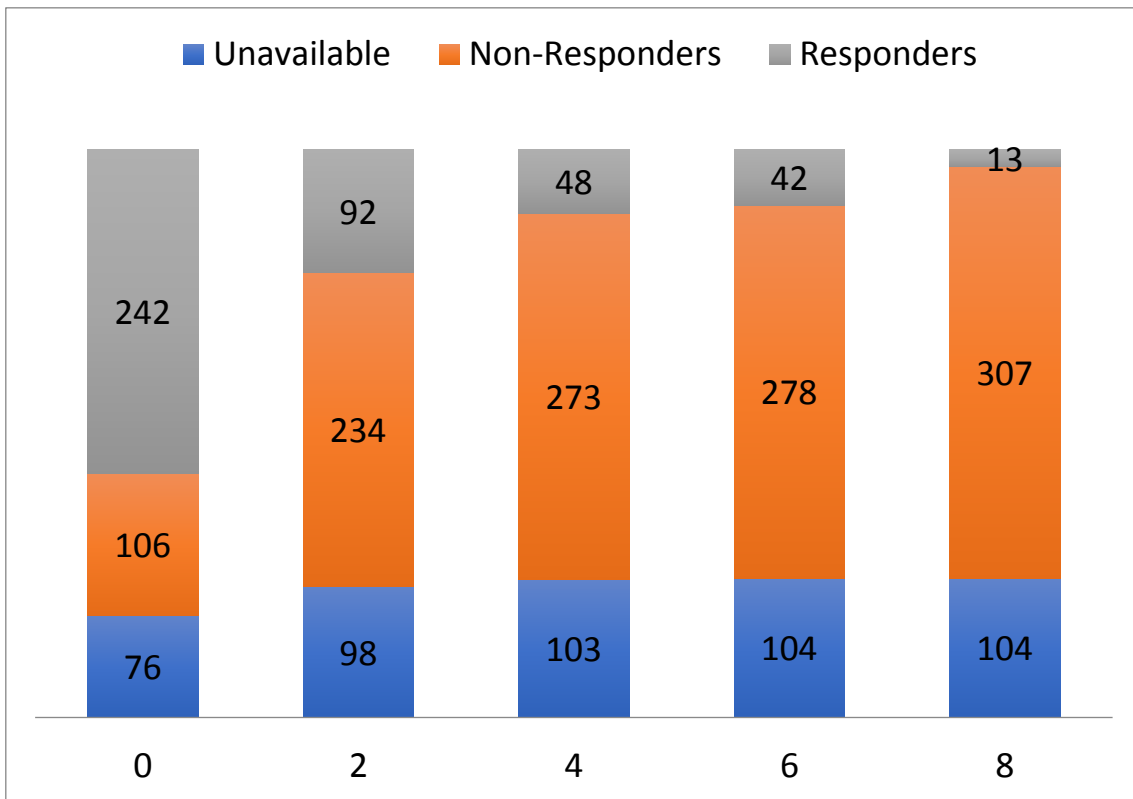

**eFigure 4. Perfusion Variables From Baseline to 72 Hours in the Peripheral Perfusion and Lactate Groups**

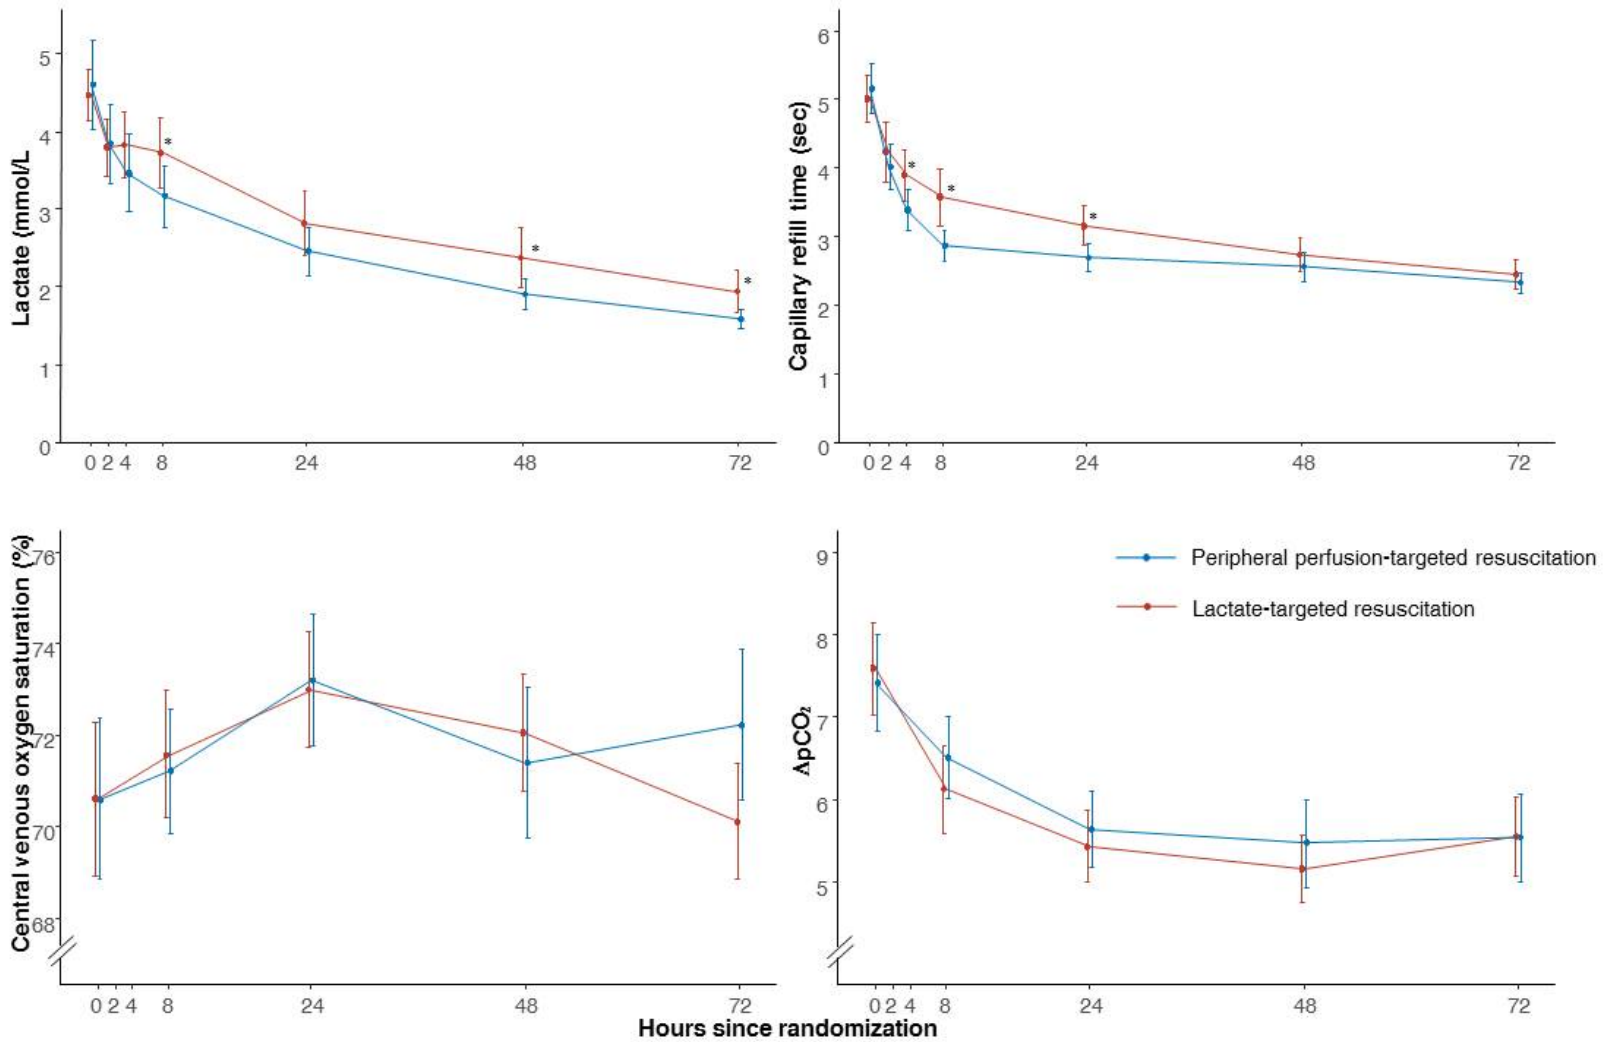

Results presented as mean and 95% confidence interval using generalized linear mixed models with different distributions: Gaussian distribution was used for central venous oxygen saturation and Gamma distribution was used for lactate, capillary refill time and central venous-arterial pCO<sub>2</sub> gradient. P values < 5% comparing groups in each time point are indicated with a \* sign.

**eFigure 5. Treatment Effect on 28-Day Mortality Across Sites**

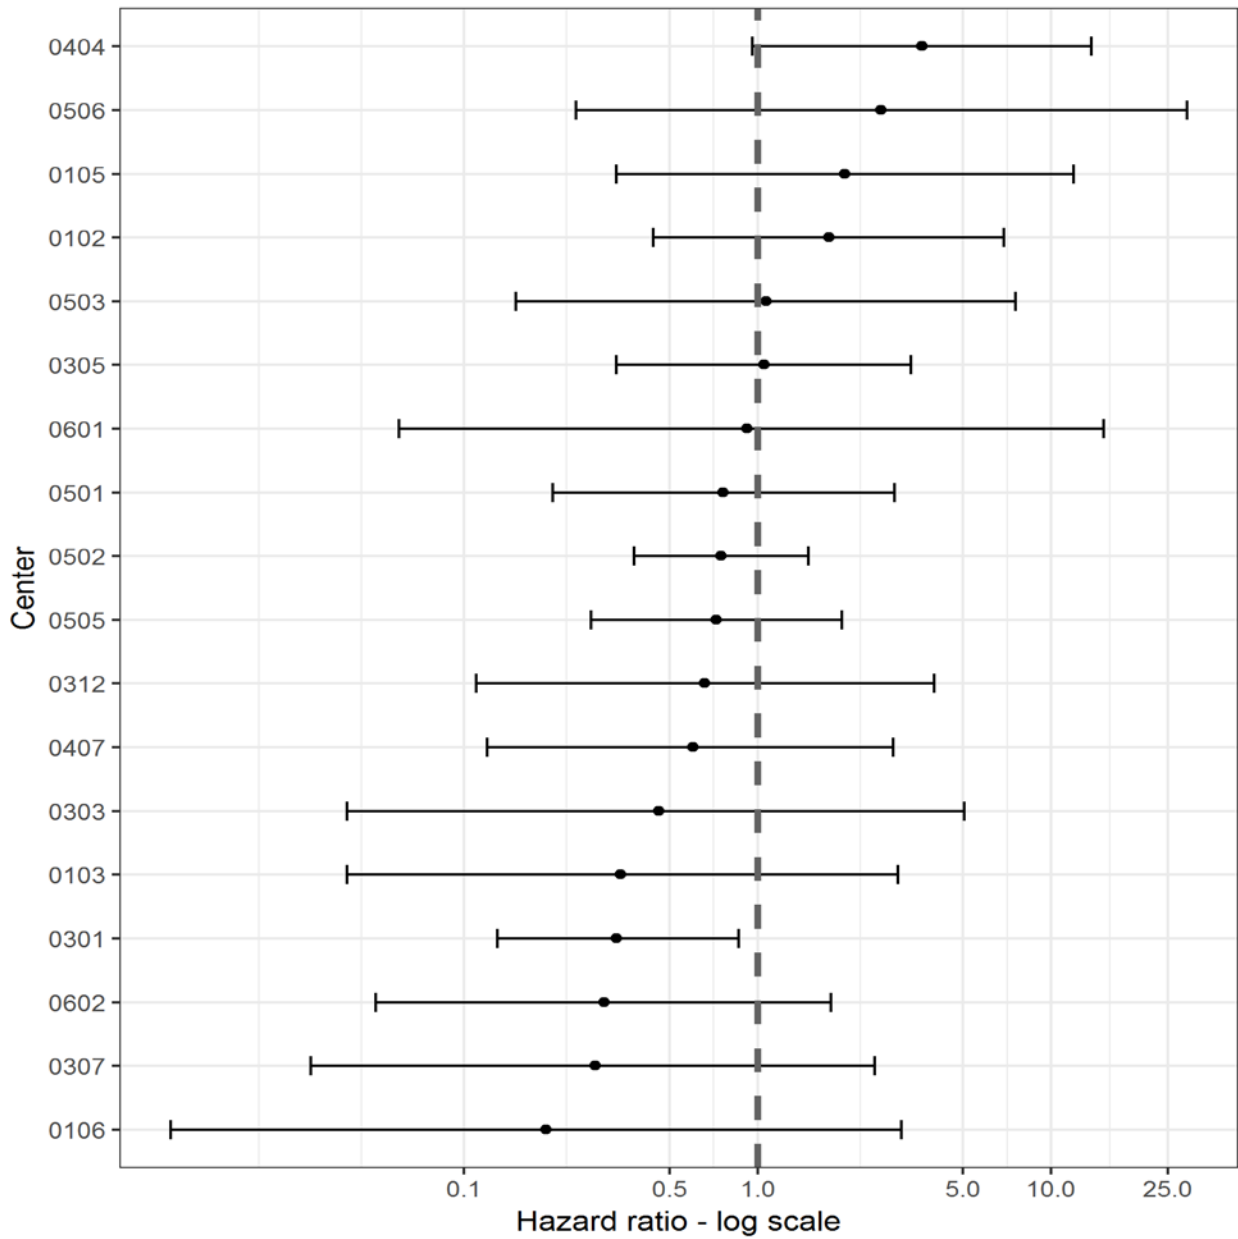

P value=0.33 for homogeneity of effect across sites, calculated with a Cox proportional-hazards model with a center-treatment interaction term and adjustment for 5 pre-specified baseline covariates: Acute Physiology and Chronic Health Evaluation (APACHE) II score, Sequential Organ-Failure Assessment (SOFA) score, lactate level, CRT, and source of infection.

## eTables

**eTable 1. Characteristics of Participant Centers, Number of Patients Enrolled and Rate of Enrolment**

| Country   | Participating site                       | Hospital type | Nº hospital beds | Nº ICU beds | Annual nº ICU presentations | Screened patients | Total nº patients recruited | Patients assigned to lactate-targeted resuscitation | Patients assigned to peripheral perfusion-targeted resuscitation | Patients randomized per month |
|-----------|------------------------------------------|---------------|------------------|-------------|-----------------------------|-------------------|-----------------------------|-----------------------------------------------------|------------------------------------------------------------------|-------------------------------|
| Argentina | Clínica La Pequeña Familia               | private       | 100              | 20          | 809                         | 42                | 5                           | 3                                                   | 2                                                                | 0.4                           |
| Argentina | Sanatorio Otamendi y Mirolli             | Private       | 206              | 28          | 374                         | 77                | 21                          | 10                                                  | 11                                                               | 1.8                           |
| Argentina | Hospital Provincial del Centenario       | public        | 190              | 16          | 515                         | 36                | 9                           | 6                                                   | 3                                                                | 0.7                           |
| Argentina | Sanatorio Parque                         | private       | 90               | 15          | 1057                        | 38                | 12                          | 7                                                   | 5                                                                | 0.9                           |
| Argentina | Hospital Interzonal San Martín           | public        | 278              | 14          | 353                         | 18                | 3                           | 1                                                   | 2                                                                | 0.3                           |
| Argentina | Sanatorio Allende                        | private       | 262              | 23          | 1189                        | 21                | 3                           | 2                                                   | 1                                                                | 0.3                           |
| Chile     | Hospital Barros-Luco Trudeau             | Public        | 900              | 21          | 865                         | 124               | 55                          | 27                                                  | 28                                                               | 5.5                           |
| Chile     | Hospital del Salvador                    | Public        | 400              | 12          | 602                         | 44                | 4                           | 2                                                   | 2                                                                | 0.3                           |
| Chile     | Hospital Dr. Sótero del Río              | Public        | 800              | 18          | 750                         | 81                | 5                           | 3                                                   | 2                                                                | 0.4                           |
| Chile     | Hospital Guillermo Grant Benavente       | Public        | 977              | 36          | 760                         | 49                | 35                          | 15                                                  | 20                                                               | 2.7                           |
| Chile     | Hospital San Juan de Dios de Curicó      | Public        | 285              | 10          | 362                         | 17                | 1                           | 1                                                   | 0                                                                | 0.1                           |
| Chile     | Hospital San Juan de Dios de Santiago    | Public        | 600              | 17          | 424                         | 43                | 11                          | 7                                                   | 4                                                                | 0.9                           |
| Chile     | Hospital Clínico Universidad de Chile    | private       | 500              | 12          | 419                         | 40                | 4                           | 2                                                   | 2                                                                | 0.3                           |
| Chile     | Pontificia Universidad Católica de Chile | private       | 480              | 32          | 10176                       | 99                | 27                          | 15                                                  | 12                                                               | 2.1                           |
| Chile     | Hospital Herminda Martinez               | Public        | 466              | 12          | 313                         | 28                | 4                           | 1                                                   | 3                                                                | 0.4                           |
| Colombia  | Hospital San Vicente de Paul             | public        | 651              | 14          | 388                         | 18                | 1                           | 1                                                   | 0                                                                | 0.1                           |
| Colombia  | Hospital de Santa Clara                  | private       | 250              | 32          | 1150                        | 15                | 5                           | 0                                                   | 5                                                                | 0.6                           |
| Colombia  | Hospital Universitario de Nariño         | public        | 380              | 20          | 1630                        | 46                | 16                          | 9                                                   | 7                                                                | 2.0                           |
| Colombia  | Fundación Valle del Lili                 | private       | 512              | 90          | 4294                        | 72                | 27                          | 18                                                  | 9                                                                | 3.0                           |



|          |                                    |         |     |    |      |     |    |    |    |     |
|----------|------------------------------------|---------|-----|----|------|-----|----|----|----|-----|
| Colombia | Hospital Universitario del Río     | private | 40  | 8  | 157  | 29  | 15 | 10 | 5  | 1.2 |
| Ecuador  | Hospital Eugenio Espejo            | public  | 400 | 23 | 817  | 154 | 55 | 27 | 28 | 4.2 |
| Ecuador  | Hospital San Francisco de Quito    | public  | 128 | 8  | 517  | 59  | 23 | 11 | 12 | 1.8 |
| Ecuador  | Hospital Enrique Garcés            | public  | 370 | 7  | 456  | 23  | 2  | 1  | 1  | 0.7 |
| Ecuador  | Hospital General Docente Calderón  | public  | 150 | 12 | 586  | 91  | 48 | 18 | 30 | 3.7 |
| Ecuador  | Hospital Carlos Andrade Marín      | public  | 600 | 35 | 1869 | 19  | 13 | 7  | 6  | 1.0 |
| Ecuador  | Hospital IESS Ibarra               | public  | 146 | 6  | 202  | 21  | 7  | 3  | 4  | 0.7 |
| Uruguay  | Hospital de Clínicas               | public  | 359 | 11 | 414  | 4   | 2  | 1  | 1  | 0.7 |
| Uruguay  | Hospital Español Juan J Crottogini | public  | 120 | 24 | 627  | 19  | 11 | 4  | 7  | 1.0 |

Two of the 28 sites (Hospital Enrique Garcés of Quito, and Hospital de Clínicas, Montevideo) left the study after 3 months because of organizational problems, and thus 26 centers participated until the end of the trial.

**eTable 2. Hemodynamic and Perfusion Variables From Baseline to 72 hours in the Peripheral Perfusion and Lactate Groups**

| Variable                                                        | Group   | Baseline           | 2h                 | 4h                 | 8h                 | 24h                | 48h                | 72h                |
|-----------------------------------------------------------------|---------|--------------------|--------------------|--------------------|--------------------|--------------------|--------------------|--------------------|
| Number of patients                                              | PP      | 212                | 191                | 189                | 183                | 163                | 151                | 144                |
|                                                                 | L       | 212                | 187                | 186                | 184                | 170                | 153                | 146                |
| Heart rate – beats / minute                                     | PP      | 103 ± 23           | 101 ± 21           | 101 ± 24           | 100 ± 23           | 93 ± 21            | 85 ± 16            | 85 ± 16            |
|                                                                 | L       | 103 ± 23           | 102 ± 22           | 102 ± 22           | 99 ± 21            | 96 ± 22            | 90 ± 19            | 87 ± 19            |
|                                                                 | P value | -                  | 0.68               | 0.89               | 0.38               | 0.54               | 0.15               | 0.81               |
| Systolic arterial blood pressure – mmHg                         | PP      | 102 ± 22           | 110 ± 19           | 110 ± 18           | 111 ± 19           | 114 ± 18           | 118 ± 17           | 118 ± 19           |
|                                                                 | L       | 99 ± 21            | 108 ± 19           | 110 ± 19           | 108 ± 21           | 112 ± 20           | 118 ± 21           | 121 ± 20           |
|                                                                 | P value | -                  | 0.33               | 0.67               | 0.28               | 0.52               | 0.97               | 0.16               |
| Diastolic arterial blood pressure – mmHg                        | PP      | 53 ± 13            | 56 ± 11            | 56 ± 10            | 57 ± 11            | 58 ± 10            | 63 ± 12            | 63 ± 11            |
|                                                                 | L       | 53 ± 12            | 57 ± 11            | 58 ± 11            | 56 ± 9             | 59 ± 11            | 63 ± 13            | 65 ± 11            |
|                                                                 | P value | -                  | 0.40               | 0.02               | 0.58               | 0.33               | 0.99               | 0.06               |
| Mean arterial blood pressure – mmHg                             | PP      | 69 ± 14            | 74 ± 10            | 74 ± 11            | 74 ± 11            | 75 ± 10            | 81 ± 12            | 80 ± 12            |
|                                                                 | L       | 68 ± 13            | 73 ± 11            | 75 ± 10            | 73 ± 11            | 76 ± 13            | 81 ± 15            | 85 ± 13            |
|                                                                 | P value | -                  | 0.79               | 0.29               | 0.49               | 0.46               | 0.63               | <b>&lt;0.01</b>    |
| Median norepinephrine dose (IQR) – mcg/Kg/min                   | PP      | 0.24 [0.11 - 0.40] | 0.24 [0.10 - 0.40] | 0.21 [0.08 - 0.41] | 0.20 [0.09 - 0.40] | 0.17 [0.08 - 0.40] | 0.11 [0.05 - 0.22] | 0.10 [0.03 - 0.18] |
|                                                                 | LT      | 0.20 [0.10 - 0.35] | 0.20 [0.10 - 0.39] | 0.22 [0.10 - 0.42] | 0.23 [0.09 - 0.44] | 0.22 [0.10 - 0.46] | 0.12 [0.07 - 0.35] | 0.10 [0.06 - 0.21] |
|                                                                 | P value | -                  | 0.58               | 0.13               | 0.17               | 0.81               | <b>&lt;0.01</b>    | <b>&lt;0.01</b>    |
| Norepinephrine use – no. (%)                                    | PP      | 208 (100)          | 186 (90.3)         | 179 (87.7)         | 162 (80.6)         | 120 (60.9)         | 78 (40.2)          | 48 (24.7)          |
|                                                                 | L       | 208 (100)          | 184 (88.0)         | 180 (86.5)         | 169 (81.6)         | 122 (58.9)         | 84 (40.6)          | 59 (28.6)          |
|                                                                 | P value | -                  | 0.90               | 0.95               | 0.80               | 0.69               | 0.93               | 0.61               |
| Median diuresis (IQR) – total ml / kg / hour in previous period | PP      | -                  | 0.6 [0.2 - 1.3]    | 0.8 [0.3 - 1.5]    | 0.8 [0.3 - 1.5]    | 0.9 [0.3 - 1.8]    | 1.0 [0.5 - 1.6]    | 1.1 [0.5 - 1.7]    |
|                                                                 | L       | -                  | 0.5 [0.2 - 1.4]    | 0.7 [0.3 - 1.4]    | 0.8 [0.4 - 1.6]    | 0.6 [0.1 - 1.3]    | 0.8 [0.2 - 1.4]    | 0.8 [0.3 - 1.5]    |
|                                                                 | P-value | -                  | 0.49               | 0.56               | 0.62               | <b>0.03</b>        | 0.21               | 0.24               |
| Lactate – mmol/l                                                | PP      | 4.6 ± 4.3          | 3.8 ± 2.6          | 3.5 ± 2.4          | 3.2 ± 2.6          | 2.5 ± 2.0          | 1.9 ± 1.2          | 1.6 ± 0.7          |
|                                                                 | L       | 4.5 ± 2.5          | 3.8 ± 2.7          | 3.8 ± 3.1          | 3.7 ± 3.3          | 2.8 ± 2.8          | 2.4 ± 2.5          | 1.9 ± 1.7          |
|                                                                 | P-value | -                  | 0.72               | 0.30               | <b>0.05</b>        | 0.09               | <b>0.01</b>        | <b>&lt;0.01</b>    |
| Median capillary refill time (IQR) – sec                        | PP      | 5 [4 - 6]          | 3.1 [2.5 - 5]      | 3 [2 - 4]          | 2.3 [2 - 3]        | 2 [2 - 3]          | 2 [2 - 3]          | 2 [2 - 3]          |
|                                                                 | L       | 4 [3 - 6]          | 3.6 [2.9 - 5]      | 3 [2.5 - 4.9]      | 3 [2 - 4]          | 3 [2 - 3.5]        | 2 [2 - 3]          | 2 [2 - 3]          |
|                                                                 | P-value | -                  | 0.52               | <b>0.01</b>        | <b>&lt;0.01</b>    | <b>&lt;0.01</b>    | 0.08               | 0.56               |
| Central venous oxygen saturation – %                            | PP      | 70.6 ± 12.8        | -                  | -                  | 71.2 ± 9.4         | 73.2 ± 9.5         | 71.4 ± 9.9         | 72.2 ± 9.6         |
|                                                                 | L       | 70.6 ± 12.0        | -                  | -                  | 71.6 ± 9.8         | 73.0 ± 8.4         | 72.1 ± 8.0         | 70.1 ± 7.6         |
|                                                                 | P-value | -                  | -                  | -                  | 0.54               | 0.83               | 0.44               | 0.12               |
| Median central venous-arterial pCO2 gradient (IQR) – mmHg       | PP      | 7 [5 - 10]         | -                  | -                  | 6 [5 - 8]          | 5 [4 - 7]          | 5 [3 - 7]          | 5 [3 - 7]          |
|                                                                 | L       | 7 [5 - 10]         | -                  | -                  | 6 [4 - 8]          | 5 [4 - 7]          | 5 [3 - 7]          | 5 [4 - 7]          |
|                                                                 | P-value | -                  | -                  | -                  | 0.16               | 0.57               | 0.70               | 0.56               |

\* Plus-minus values are means  $\pm$  SD. PP denotes peripheral perfusion group, L, lactate group, and pCO<sub>2</sub>, partial pressure of carbon dioxide. Comparisons were done using generalized linear mixed models with different distributions: Gaussian distribution was used for heart rate, central venous oxygen saturation, systolic, diastolic and mean arterial blood pressures; gamma distribution was used for norepinephrine dose, diuresis, lactate, capillary refill time and central venous-arterial pCO<sub>2</sub> gradient; binomial (logistic model) was used for norepinephrine.

**eTable 3. Protocol Violations and Deviations\***

| Type of violation or deviation               | Peripheral Perfusion-Targeted Resuscitation Group (N = 212) | Lactate-Targeted Resuscitation Group (N = 212) |
|----------------------------------------------|-------------------------------------------------------------|------------------------------------------------|
| <b>Eligibility criteria violation†</b>       | <b>2</b>                                                    | <b>3</b>                                       |
| Inclusion criteria                           | 1                                                           | 2                                              |
| No need of vasopressor                       | 1                                                           | 1                                              |
| Normal lactate                               | 0                                                           | 1                                              |
| Exclusion criteria                           | 1                                                           | 1                                              |
| Age less than 18 years-old                   | 1                                                           | 0                                              |
| Advanced cirrhosis                           | 0                                                           | 1                                              |
| <b>Treatment protocol violation</b>          | <b>3</b>                                                    | <b>3</b>                                       |
| Did not receive assigned treatment           | 5                                                           | 3                                              |
| Lack of personnel to deliver intervention    | 4                                                           | 2                                              |
| Malfunction of lactate point-of-care device  | 0                                                           | 1                                              |
| Urgent surgery                               | 1                                                           | 0                                              |
| <b>Treatment protocol deviation</b>          | <b>26</b>                                                   | <b>20</b>                                      |
| Treatment protocol mismanagement             | 16                                                          | 16                                             |
| Administering fluid bolus when not indicated | 5                                                           | 4                                              |
| Not administering fluid bolus when indicated | 4                                                           | 4                                              |
| Mismanagement of vasopressor test            | 4                                                           | 5                                              |
| Mismanagement of inodilator test             | 3                                                           | 3                                              |
| Early termination of assigned treatment      | 10                                                          | 4                                              |
| Refractory shock                             | 8                                                           | 4                                              |
| Urgent surgery                               | 1                                                           | 0                                              |
| Gastrointestinal bleeding                    | 1                                                           | 0                                              |

\* All patients were analyzed according to the treatment group they were randomly assigned, irrespective of violations or deviations.

† Cases that were randomized but did not meet eligibility criteria were treated according to randomly assigned treatment group.

**eTable 4. Use of Vasopressor Test, Inodilator Test and Adjunctive Drugs for Shock**

| Treatment                        | Peripheral Perfusion Group (n=212) | Lactate Group (n=212) | P Value* |
|----------------------------------|------------------------------------|-----------------------|----------|
| Vasopressor test – no. (%)       | 61 (28.8)                          | 85 (40.1)             | 0.02     |
| Inodilator test – no. (%)        | 30 (14.2)                          | 36 (17.0)             | 0.60     |
| Any adjunctive therapy – no. (%) | 45 (21.2)                          | 62 (29.2)             | 0.07     |
| Steroids                         | 32 (15.1)                          | 49 (23.1)             | 0.06     |
| Epinephrine                      | 21 (9.9)                           | 35 (16.5)             | 0.01     |
| Vasopressin                      | 2 (0.9)                            | 12 (5.7)              | 0.42     |
| High Volume Hemofiltration       | 5 (2.4)                            | 9 (4.2)               | 0.05     |

\* P values calculated with Fisher exact test.

**eTable 5. Capillary Refill Time and Lactate Levels at Each Time Point of the Intervention Period in Fluid Unresponsive Patients**

**Peripheral Perfusion Group**

|    |     | CRT                         | Lactate                |
|----|-----|-----------------------------|------------------------|
|    | n   | Median [IQR 25-75]<br>(sec) | Mean $\pm$ SD (mmol/l) |
| T0 | 49  | 4.0 [3.0-6.0]               | 4.3 $\pm$ 2.3          |
| T2 | 119 | 3.0 [2.2-4.0]               | 3.8 $\pm$ 2.8          |
| T4 | 141 | 3.0 [2.0-4.0]               | 3.5 $\pm$ 2.6          |
| T8 | 156 | 2.2 [2.0-3.0]               | 3.2 $\pm$ 2.9          |

**Lactate Group**

|    |     | CRT                         | Lactate                |
|----|-----|-----------------------------|------------------------|
|    | n   | Median [IQR 25-75]<br>(sec) | Mean $\pm$ SD (mmol/l) |
| T0 | 57  | 4.0 [2.0-6.0]               | 4.4 $\pm$ 2.3          |
| T2 | 115 | 3.0 [2.8-4.5]               | 3.5 $\pm$ 2.6          |
| T4 | 132 | 3.0 [2.2-4.9]               | 3.5 $\pm$ 2.9          |
| T8 | 151 | 3.0 [2.0-4.0]               | 3.5 $\pm$ 2.9          |

**eTable 6. Sensitivity Analyses of the Treatment Effect on the Primary Outcome**

| Type of analysis                                                                                                                                       | Cox Proportional hazards or Frailty Cox Model* | Hazard ratio (95% CI) | P Value |
|--------------------------------------------------------------------------------------------------------------------------------------------------------|------------------------------------------------|-----------------------|---------|
| <b>Pre-specified sensitivity analyses†</b>                                                                                                             |                                                |                       |         |
| Intention to treat analysis, adjusted by APACHE II, SOFA, Infection source, CRT and lactate                                                            | Frailty Cox model                              | 0.75 (0.57 to 0.98)   | 0.04    |
| <b>Post hoc sensitivity analyses</b>                                                                                                                   |                                                |                       |         |
| Intention-to-treat unadjusted analysis                                                                                                                 | Cox proportional hazards model                 | 0.79 (0.58 to 1.07)   | 0.13    |
| Intention-to-treat analysis, adjusted by APACHE II, SOFA, infection source, CRT, lactate and intravenous fluid loading per weight before randomization | Cox proportional hazards model                 | 0.75 (0.55 to 1.02)   | 0.07    |
| <i>Per protocol</i> (8h protocol completed) analysis, adjusted by APACHE II, SOFA, infection source, CRT and lactate.                                  | Cox proportional hazards model                 | 0.72 (0.52 to 0.99)   | 0.04    |
| <i>Per protocol</i> (8h protocol completed) unadjusted analysis                                                                                        | Cox proportional hazards model                 | 0.76 (0.55 to 1.04)   | 0.09    |
| Intention-to-treat unadjusted analysis                                                                                                                 | Frailty Cox model                              | 0.79 (0.59 to 1.05)   | 0.11    |
| <i>Per protocol</i> 8h protocol completed) analysis, adjusted by APACHE, SOFA, Infection source, CRT and lactate.                                      | Frailty Cox model                              | 0.72 (0.56 to 0.93)   | 0.01    |

\* Frailty models with trial center as random effects. Reported Hazard ratio is the marginal effect (e.g., average effect over the distribution of the center random effects).

† Sensitivity analysis pre-specified in our statistical analysis plan elaborated and submitted for publication before the database was locked and analyses were started.
