# Supplementary material
Source: PubMed Central journal article supplement (PMC6439620)
Supplement: jama-321-654-s003.pdf [file jama-321-654-s003.pdf]

Hernández G, Ospina-Tascón GA, Petri Damiani L, et al; ANDROMEDA-SHOCK Investigators and the Latin America Intensive Care Network (LIVEN). Effect of a resuscitation strategy targeting peripheral perfusion status vs serum lactate levels on 28-day mortality among patients with septic shock: the ANDROMEDA-SHOCK ransomized clinical trial. *JAMA*. doi:10.1001/jama.2019.0071

## Data Sharing Statement

### Data

**Data available:** Yes

**Data types:** Deidentified participant data

**How to access data:** Request must be sent to Glenn Hernández ([glennnguru@gmail.com](mailto:glennnguru@gmail.com))

**When available:** With publication

### Supporting Documents

**Document types:** None

### Additional Information

**Who can access the data:** researchers whose proposed use of the data has been approved

**Types of analyses:** for a specified purpose

**Mechanisms of data availability:** after approval of a proposal
